# Supplementary material for: 2′-O-Methylation can increase the abundance and lifetime of alternative RNA conformational states
Source: PubMed Central journal article supplement — Nucleic Acids Res. 2020 Oct 26;48(21):12365–79. doi: 10.1093/nar/gkaa928 (PMC7708057; doi:10.1093/nar/gkaa928), 2020-10-26
Supplement: gkaa928_supplemental_file.pdf [file gkaa928_supplemental_file.pdf]

## Supporting information

### **2'-O-methylation can increase the abundance and lifetime of alternative RNA conformational states**

Hala Abou Assi,<sup>1,2</sup> Atul K. Rangadurai,<sup>1</sup> Honglue Shi,<sup>3</sup> Bei Liu,<sup>1</sup> Mary C. Clay,<sup>1</sup> Kevin Erharter,<sup>4</sup> Christoph Kreutz,<sup>4</sup> Christopher L. Holley,<sup>2\*</sup> and Hashim M. Al-Hashimi<sup>1,3\*</sup>

<sup>1</sup>Department of Biochemistry, Duke University School of Medicine, Durham, NC 27710, USA

<sup>2</sup>Department of Medicine, Duke University School of Medicine, Durham, NC 27710, USA

<sup>3</sup>Department of Chemistry, Duke University, Durham, NC 27708, USA

<sup>4</sup>Institute of Organic Chemistry and Center for Molecular Biosciences Innsbruck (CMBI), University of Innsbruck, 6020 Innsbruck, Austria

\* To whom correspondence should be addressed. Tel: +1 919 668 2688; Fax: +1 919 613 2321; Email: cholley@duke.edu and Tel: +1 919 660 1113; Fax: +1 919 684 8885; Email: hashim.al.hashimi@duke.edu

Present Address: Mary C. Clay, Department of Structural Biology, St. Jude Children's Research Hospital, Memphis, TN, USA

## Supplementary Figures

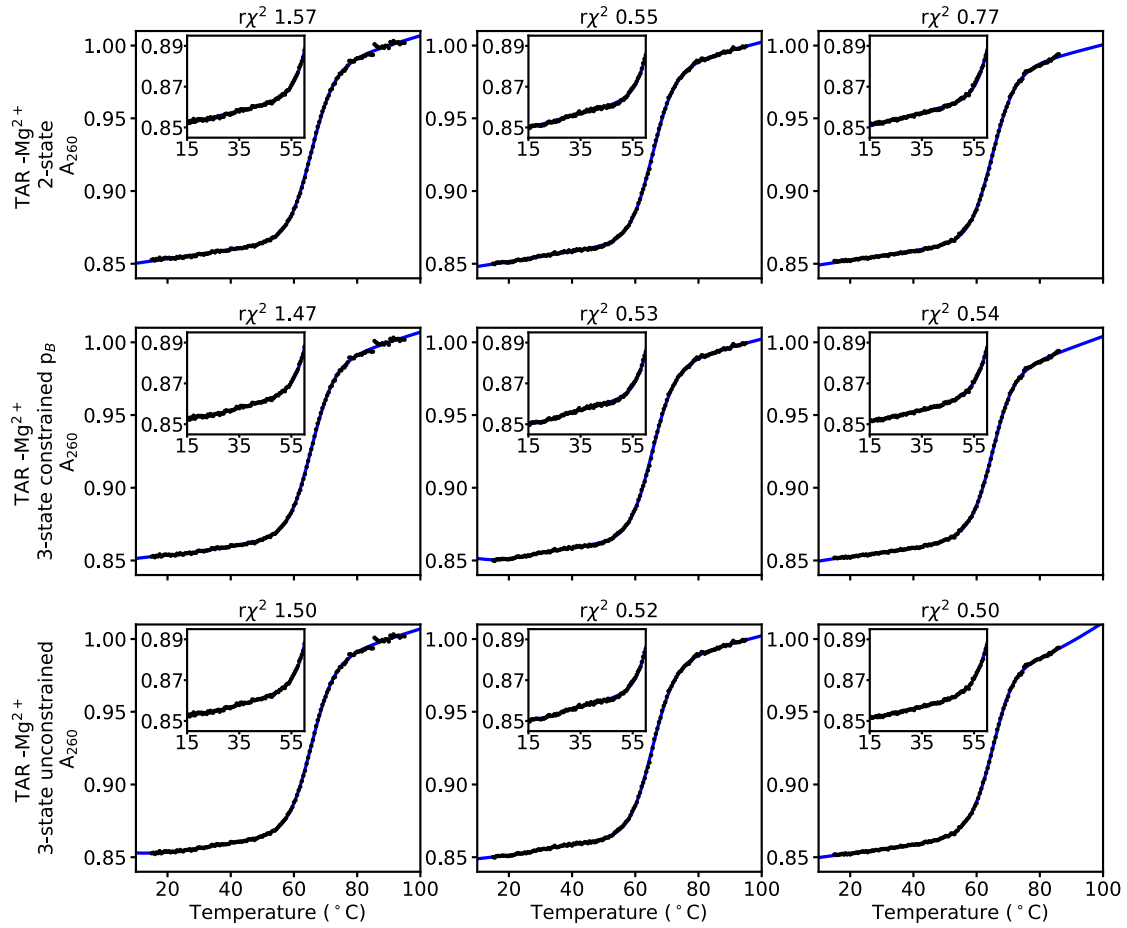

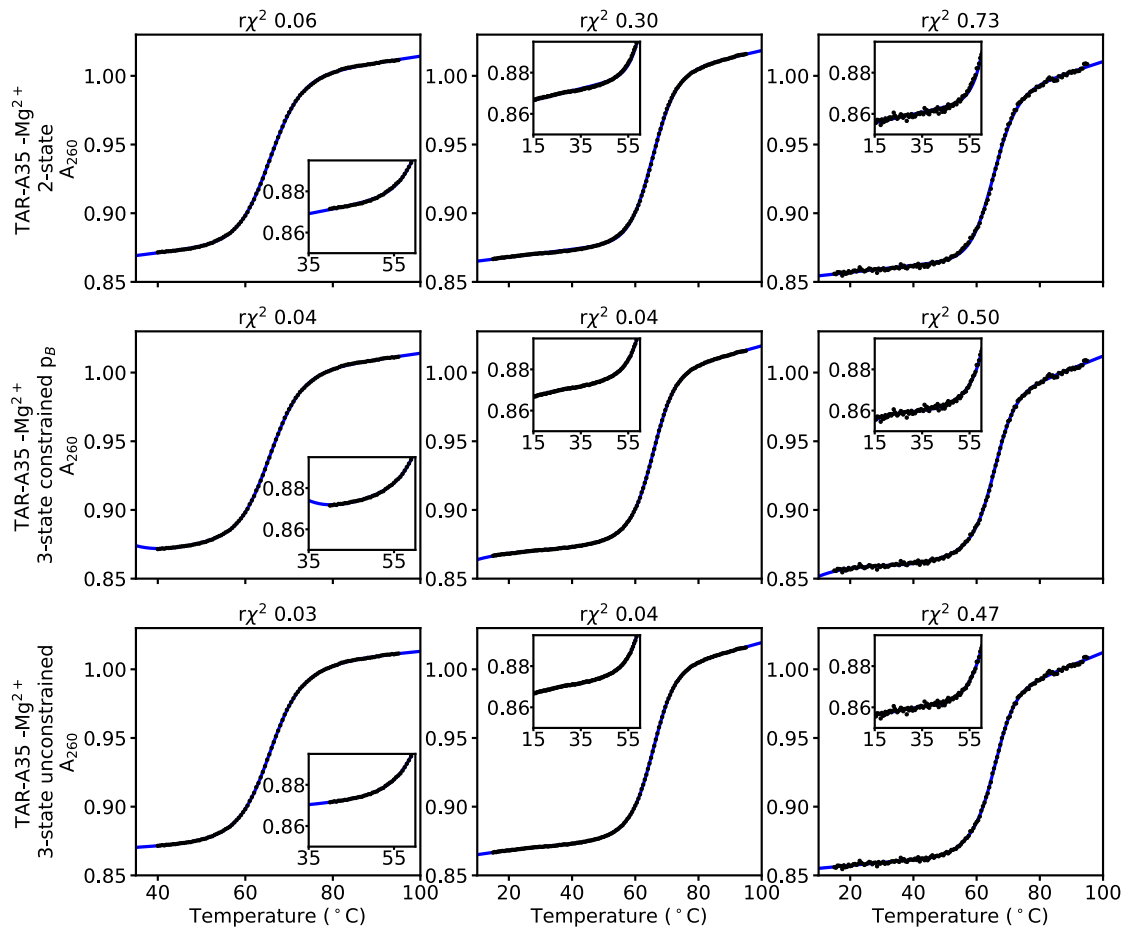

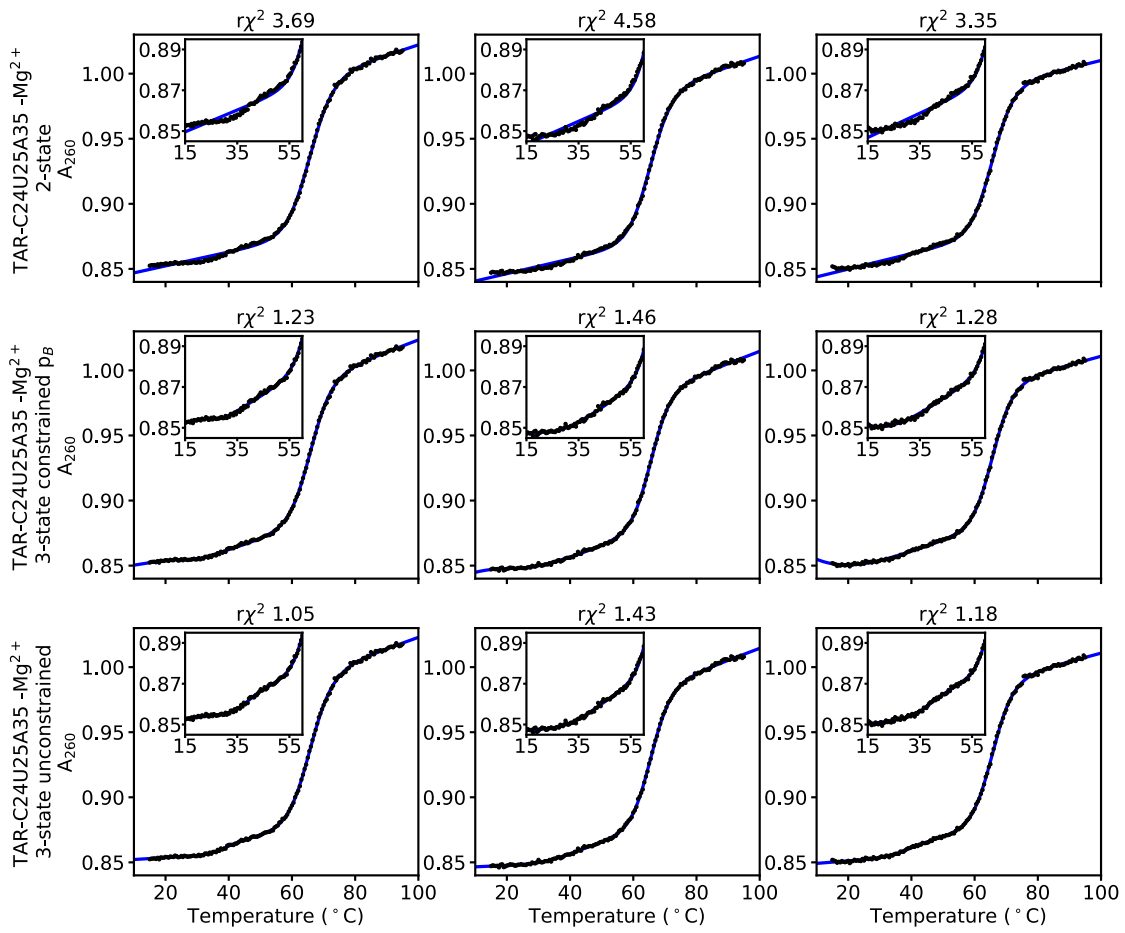

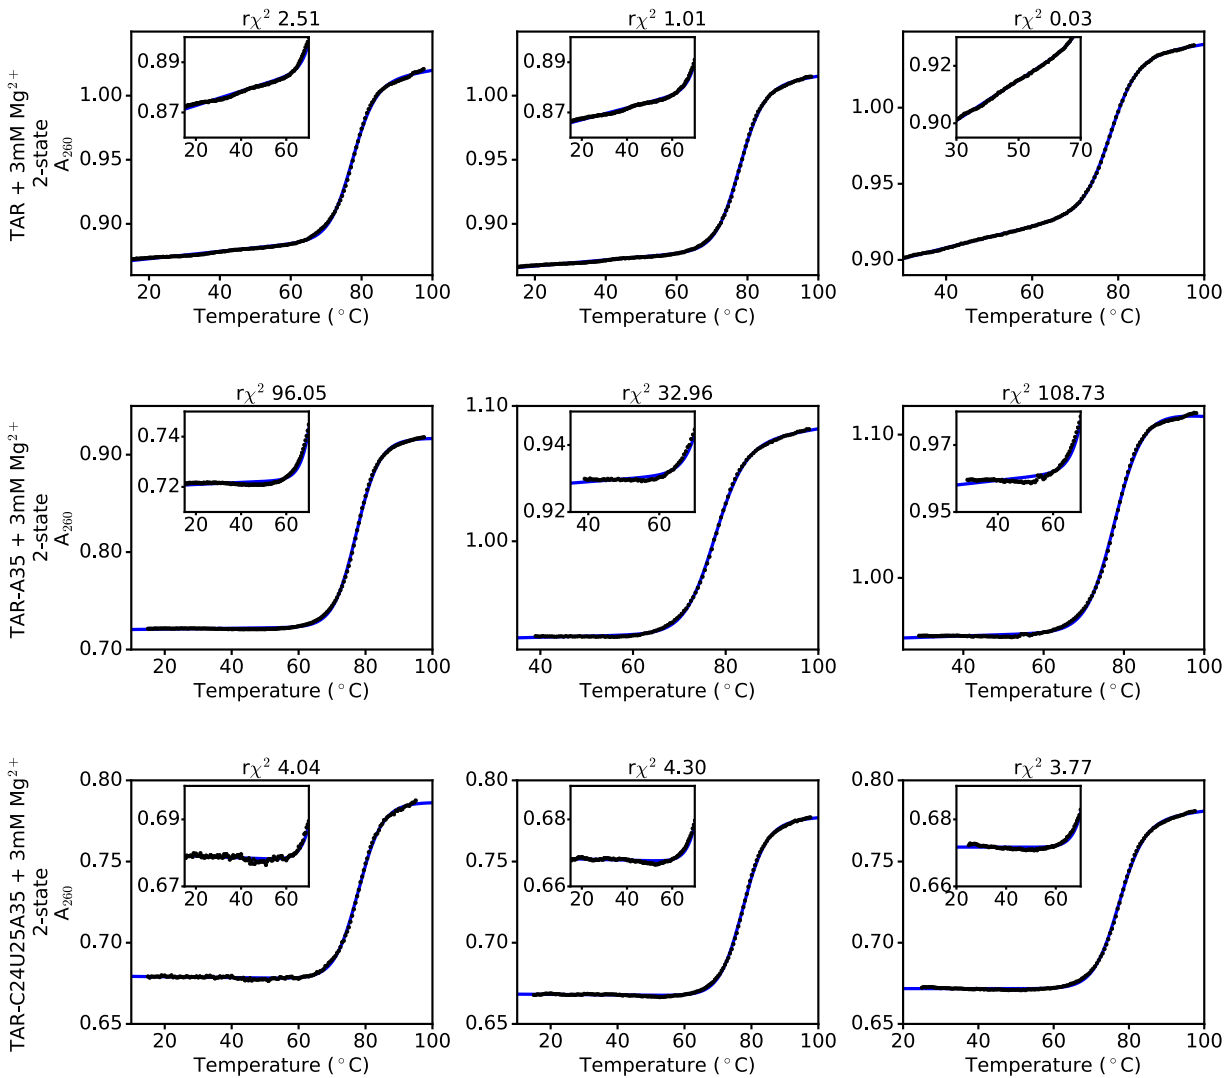

**Figure S1.** Fits of UV-melting data for TAR samples. Shown are the UV melting curves (black dots) for TAR variants (triplicates for each sample) and fits (blue line) to two-state, unconstrained three-state, and constrained three-state fits (see methods).

A

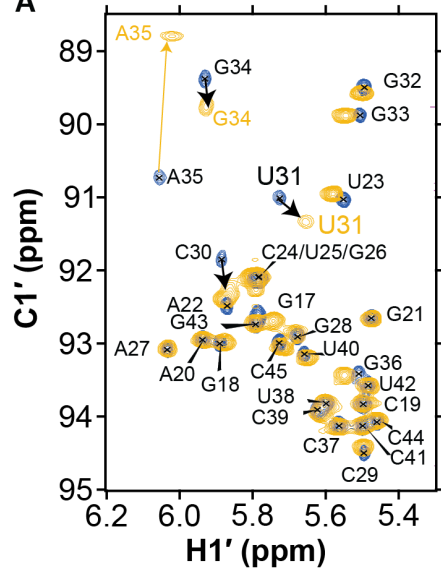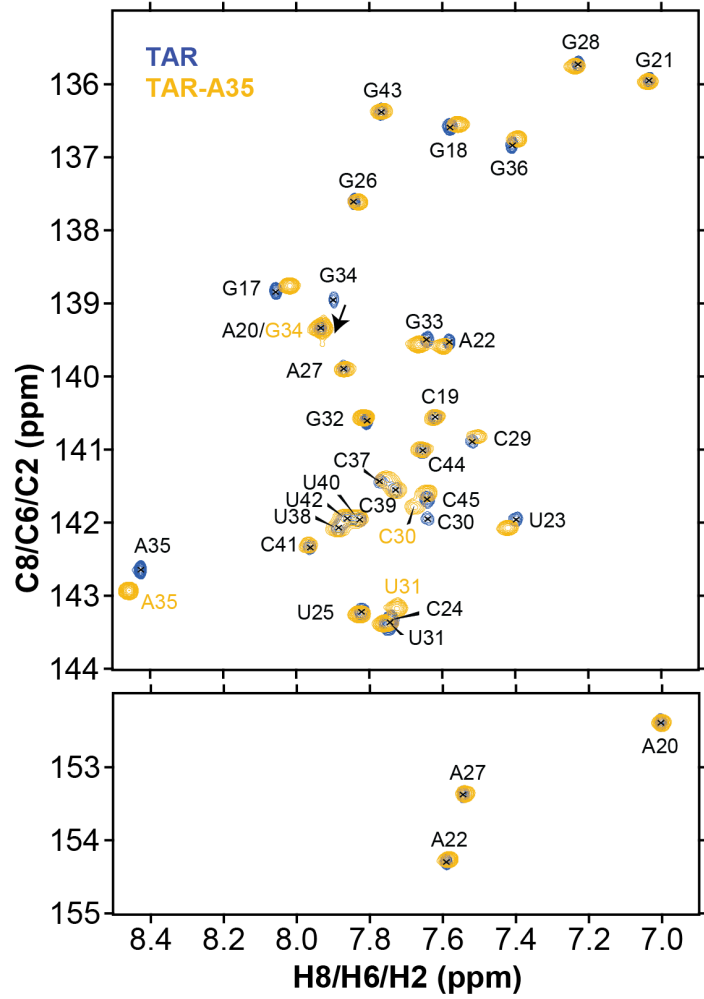

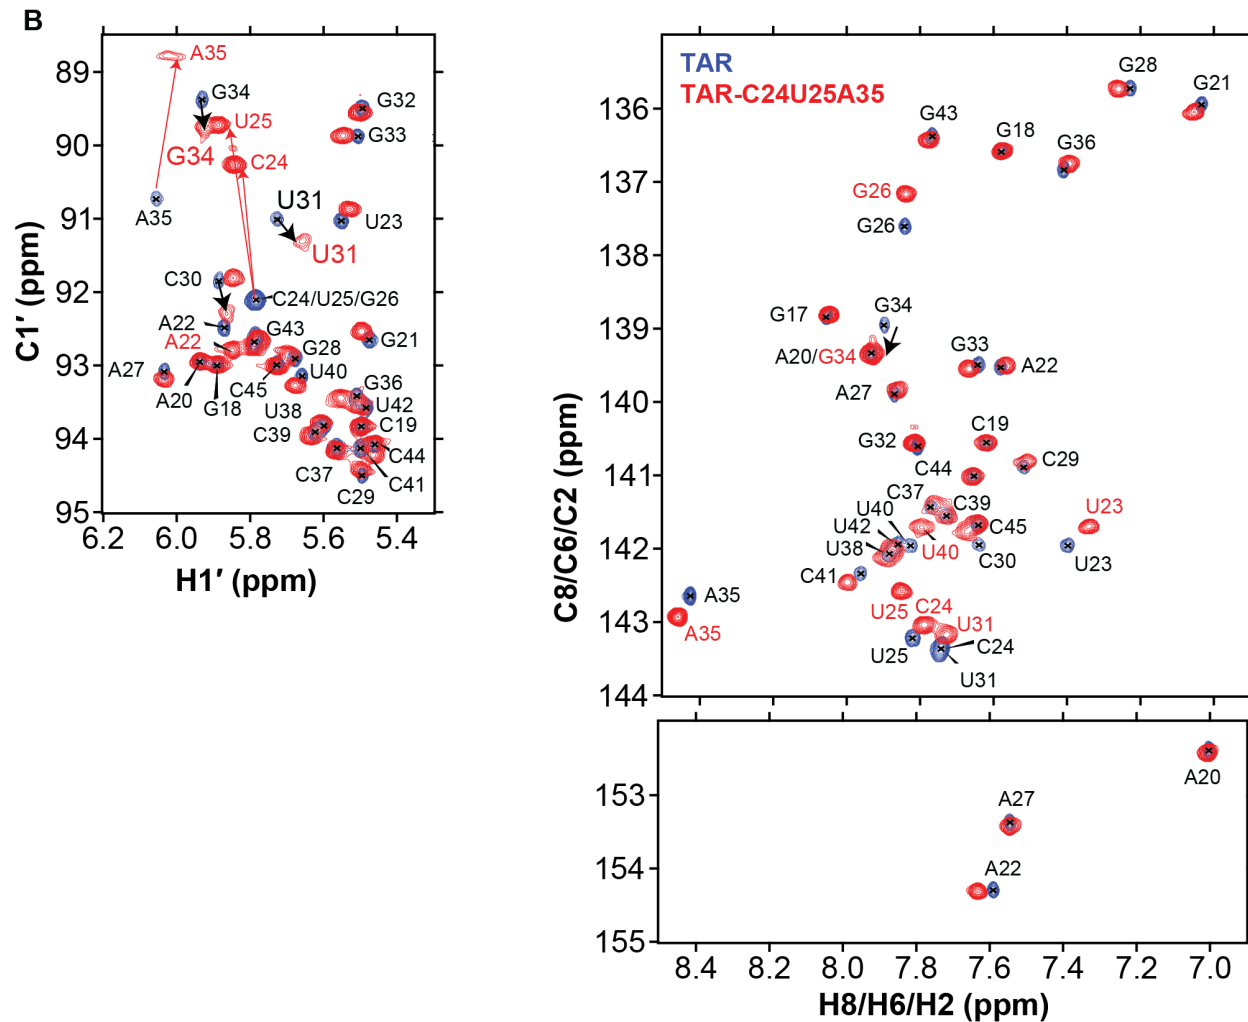

**Figure S2.** Overlay of unlabeled 2D [ $^{13}\text{C}$ ,  $^1\text{H}$ ] HSQC spectra of A) TAR-A35 (pH 6.4) and B) TAR-C24U25A35 (pH 6.4) with TAR (pH 6.4). Black arrows for the C30-C1', U31-C1', G34-C1' and G34-C8 indicate CSPs towards ES1 in TAR-A35 and TAR-C24U25A35. Yellow arrow at A35-C1' in TAR-A35 and red arrows at C24-C1', U25-C1' and A35-C1' in TAR-C24U25A35 indicate the upfield shift of C1' due to the chemical modification at the 2' position. Sample conditions: 15 mM NaPO<sub>4</sub>, 25 mM NaCl and 0.1 mM EDTA, pH 6.4, and 25 °C.

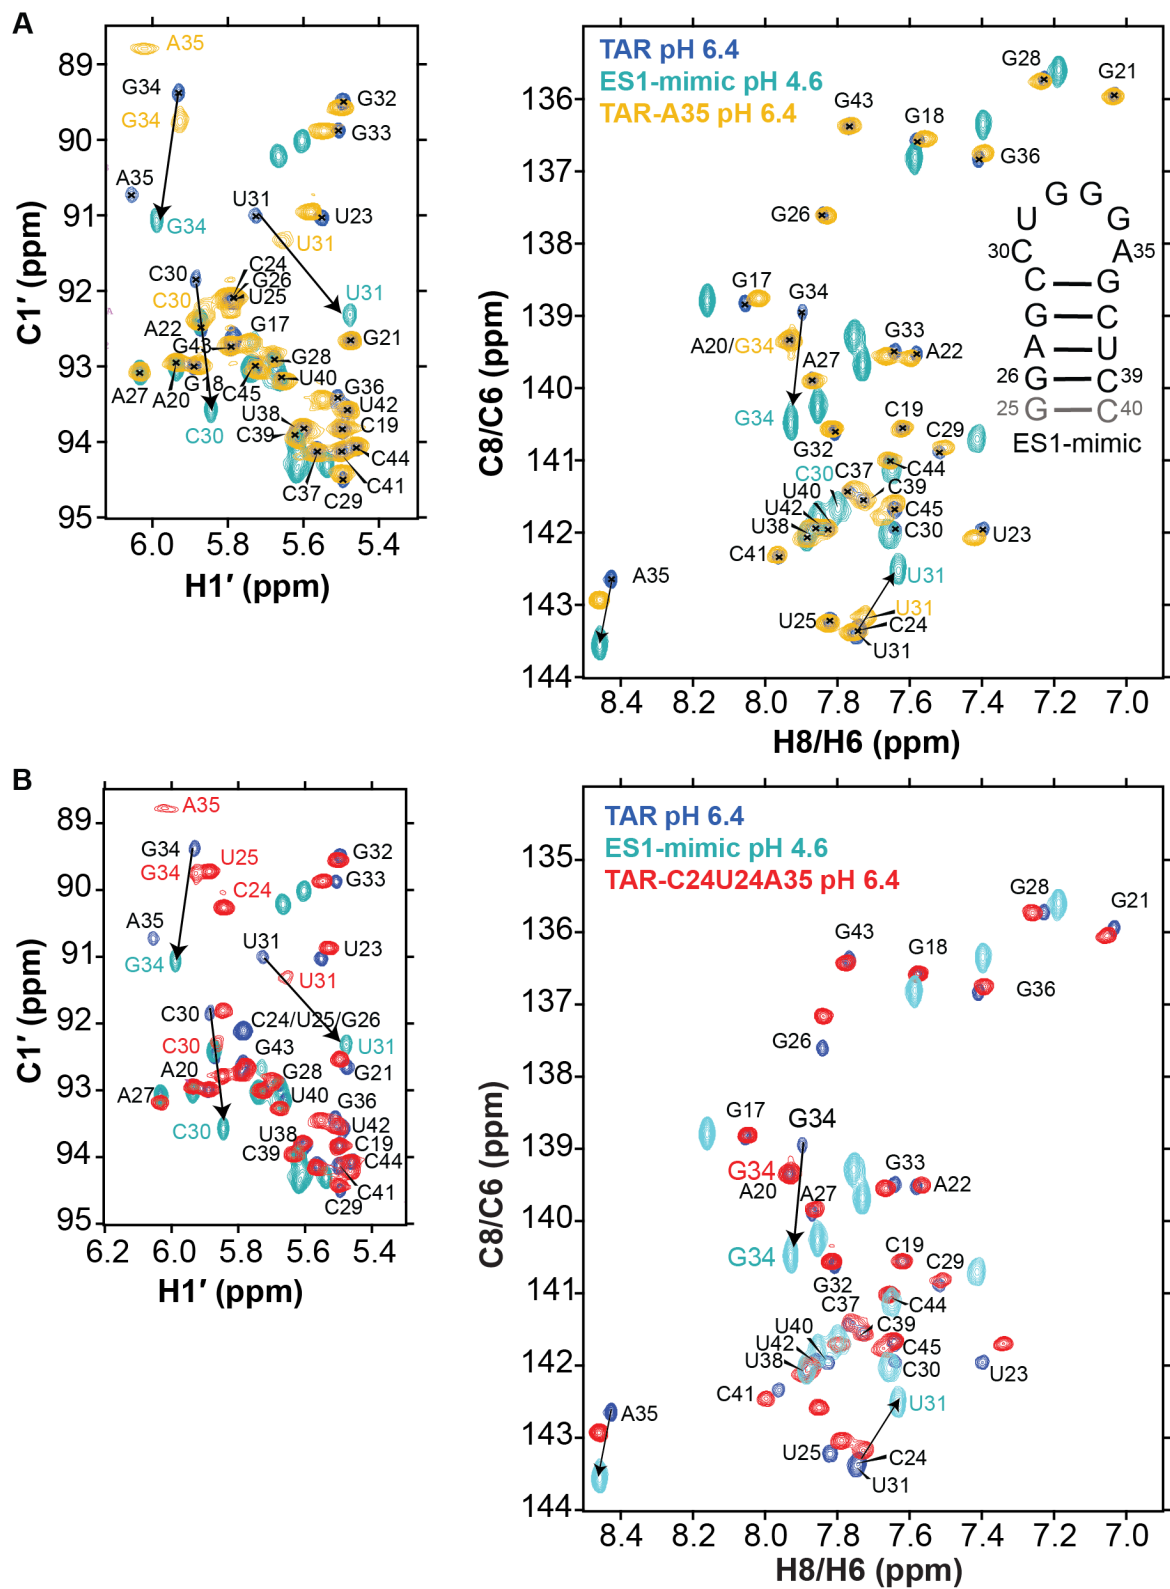

**Figure S3.** Overlay of C1'-H1' and aromatic region of unlabeled 2D [ $^{13}\text{C}$ ,  $^1\text{H}$ ] HSQC spectra of TAR (pH 6.4) and a TAR ES1-mimic (pH 4.6) (1) with A) TAR-A35 (pH 6.4) and B) TAR-C24U25A35 (pH 6.4). In the



previously reported TAR ES1-mimic (1), the bulge and lower helix were omitted to simplify analysis of ES1. Black arrows at C30-C1', U31-C1', G34-C1' and G34-C8 indicate a shift towards ES1 chemical shifts in TAR-A35 and TAR-C24U25A35. Sample conditions: 15 mM NaPO<sub>4</sub>, 25 mM NaCl and 0.1 mM EDTA, pH 6.4, and 25 °C.

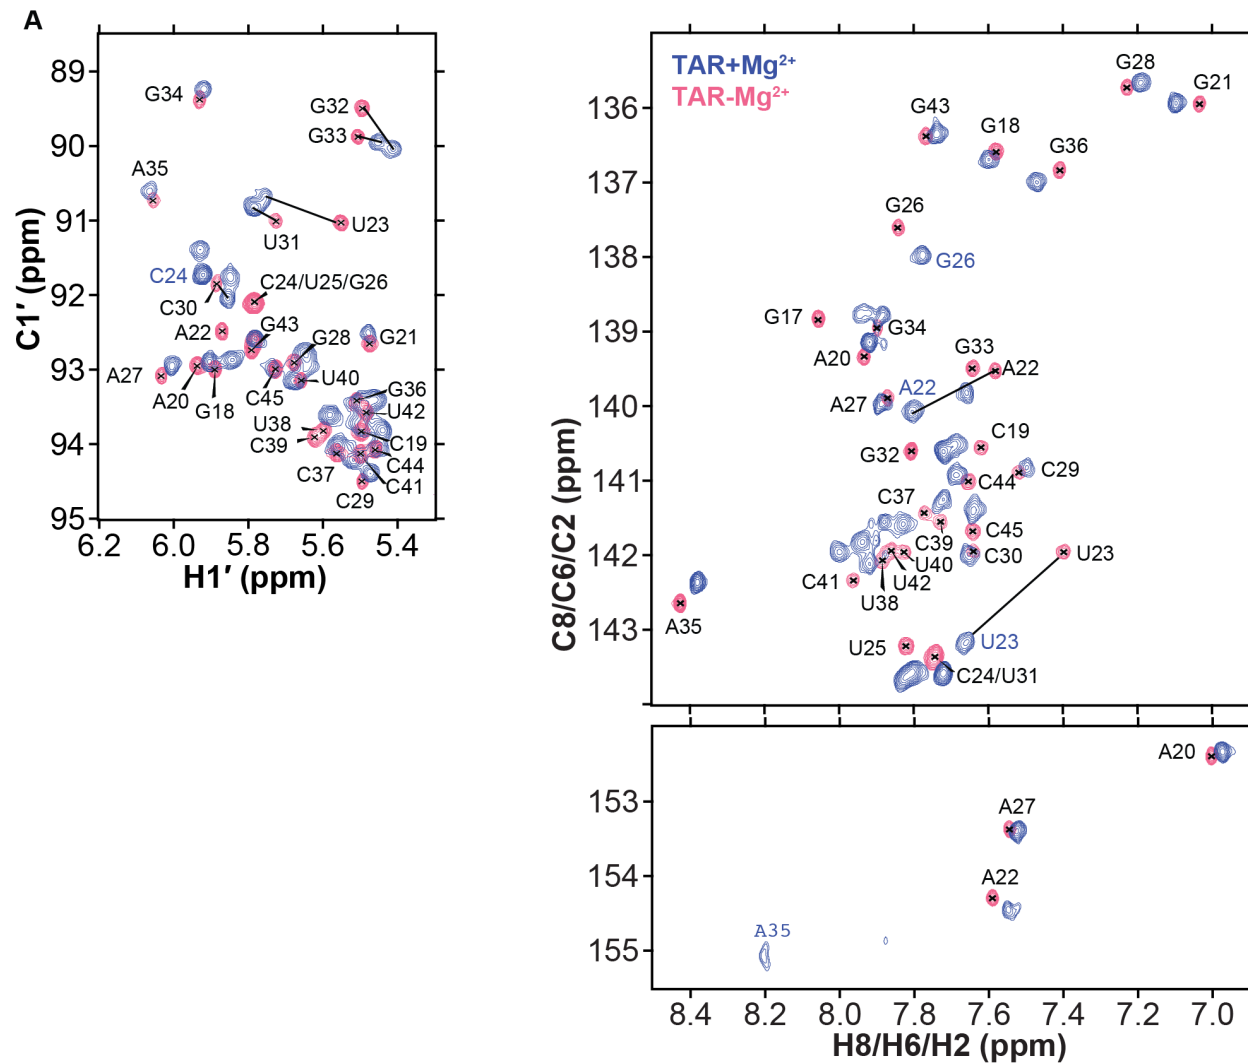

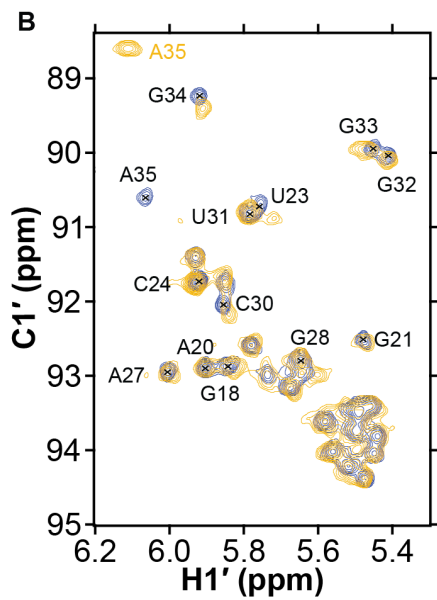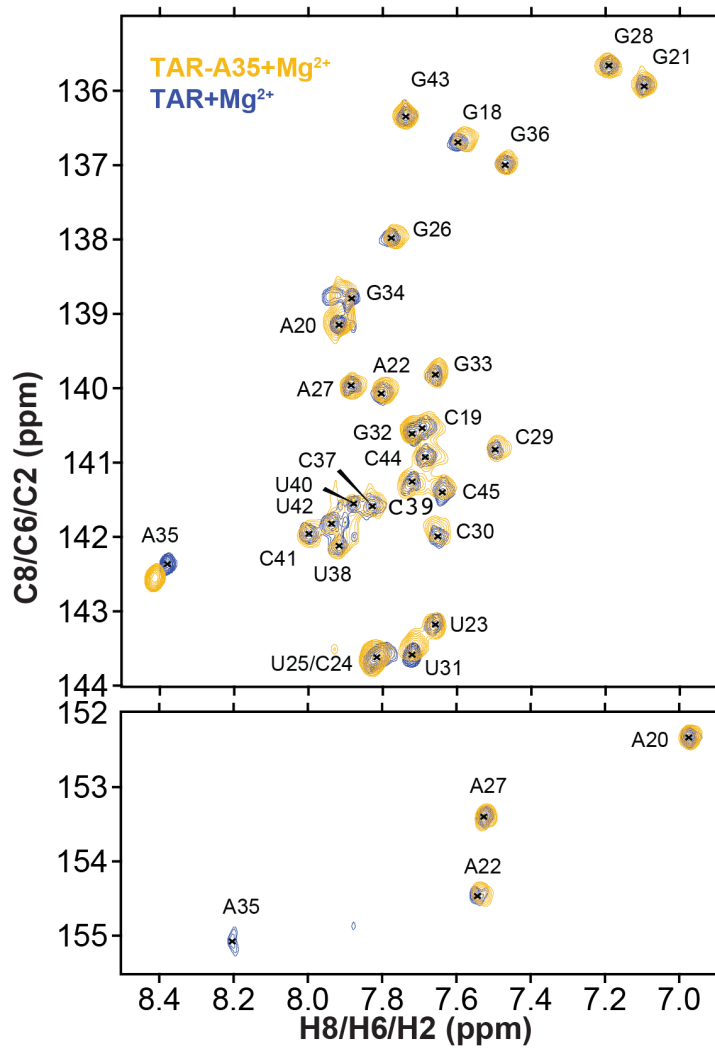

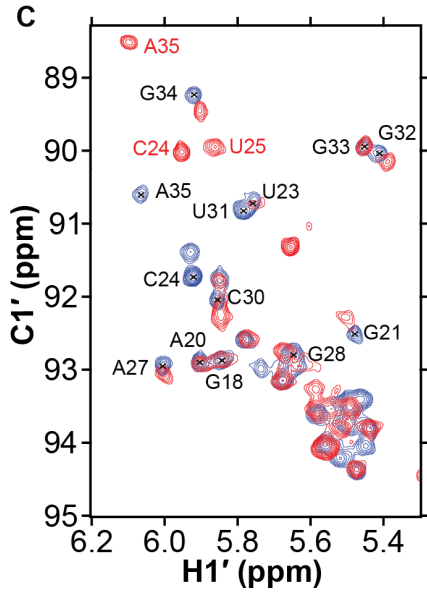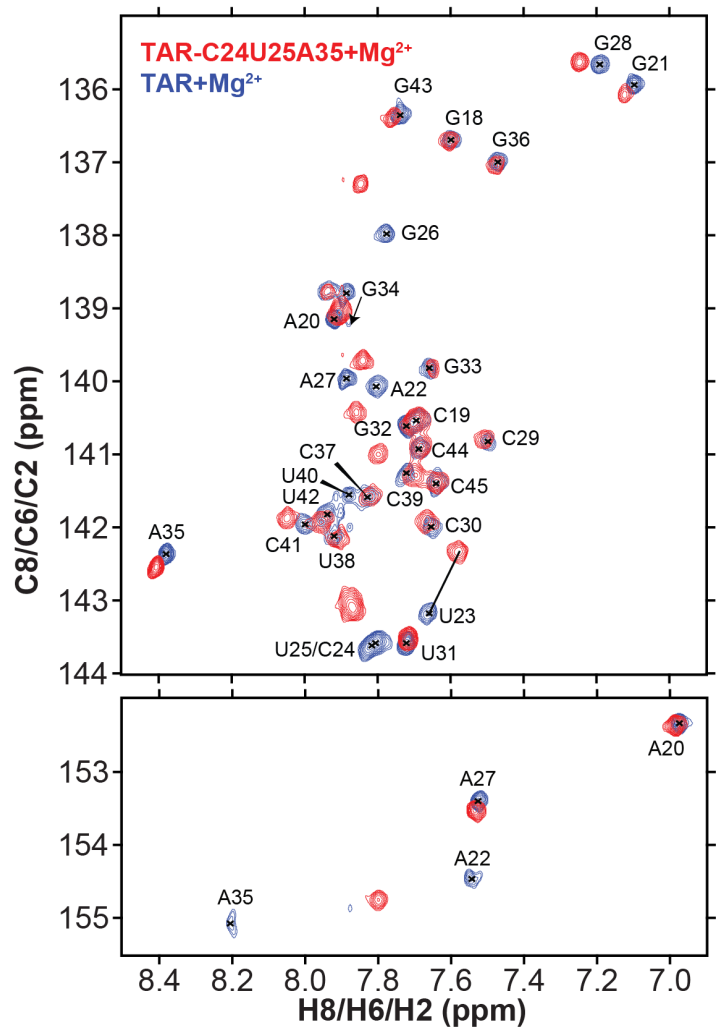

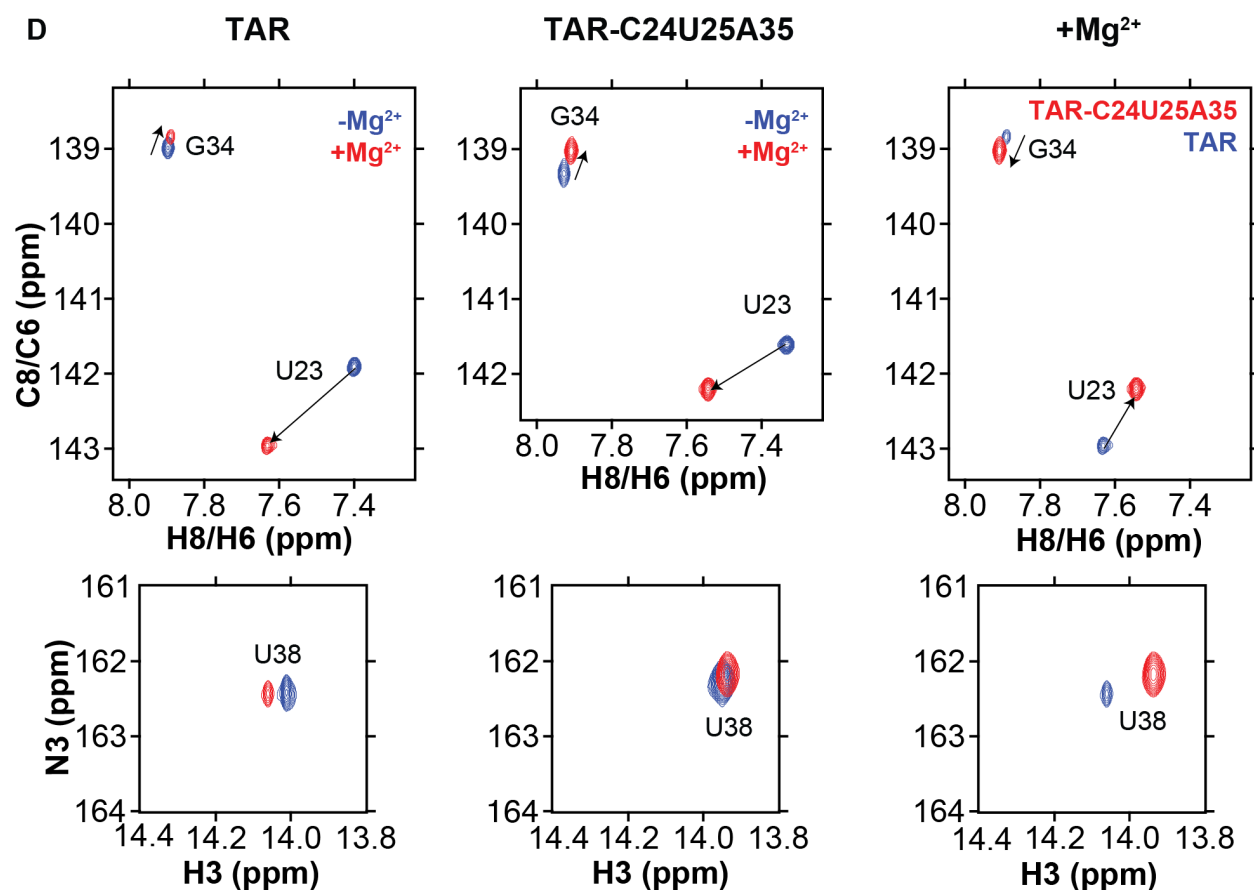

**Figure S4.** Overlay of unlabeled C1'-H1' and aromatic region of 2D [<sup>13</sup>C, <sup>1</sup>H] HSQC spectra of TAR (pH 6.4) in the presence of 3 mM Mg<sup>2+</sup> with A) TAR (pH 6.4) in the absence of Mg<sup>2+</sup>, B) TAR-A35 (pH 6.4) in 3 mM Mg<sup>2+</sup> and C) TAR-C24U25A35 (pH 6.4) in 3 mM Mg<sup>2+</sup>. D) Overlay of site-labeled 2D [<sup>13</sup>C, <sup>1</sup>H] and 2D [<sup>15</sup>N, <sup>1</sup>H] of TAR (pH 6.4) and TAR-C24U25A35 (pH 6.4) in the presence and absence of 1 mM Mg<sup>2+</sup>. Samples were isotopically site-labeled with <sup>13</sup>C at G34-C8 and U23-C6 and <sup>15</sup>N at U38-N3. Sample conditions: 15 mM NaPO<sub>4</sub>, 25 mM NaCl and 0.1 mM EDTA, pH 6.4, and 25 °C.

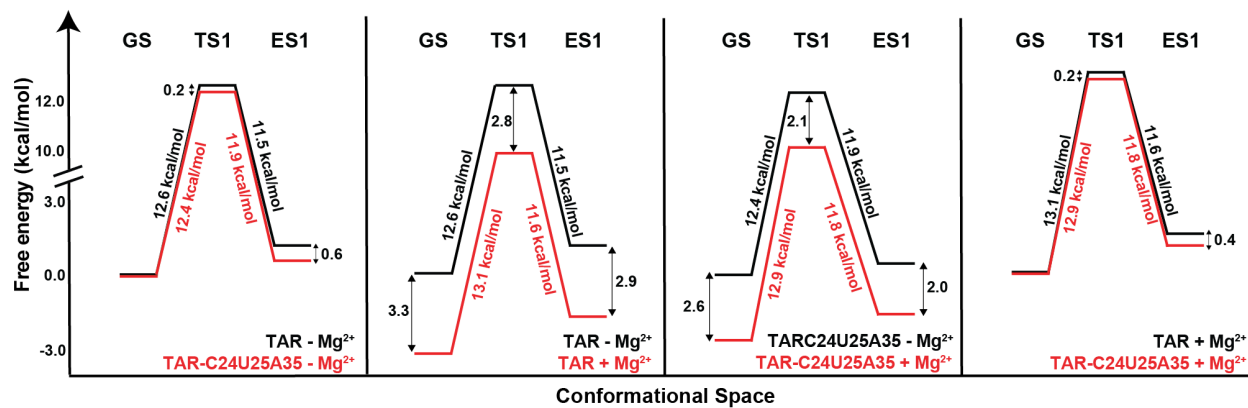

Figure S5. Free energy diagrams of GS-ES1 exchange.

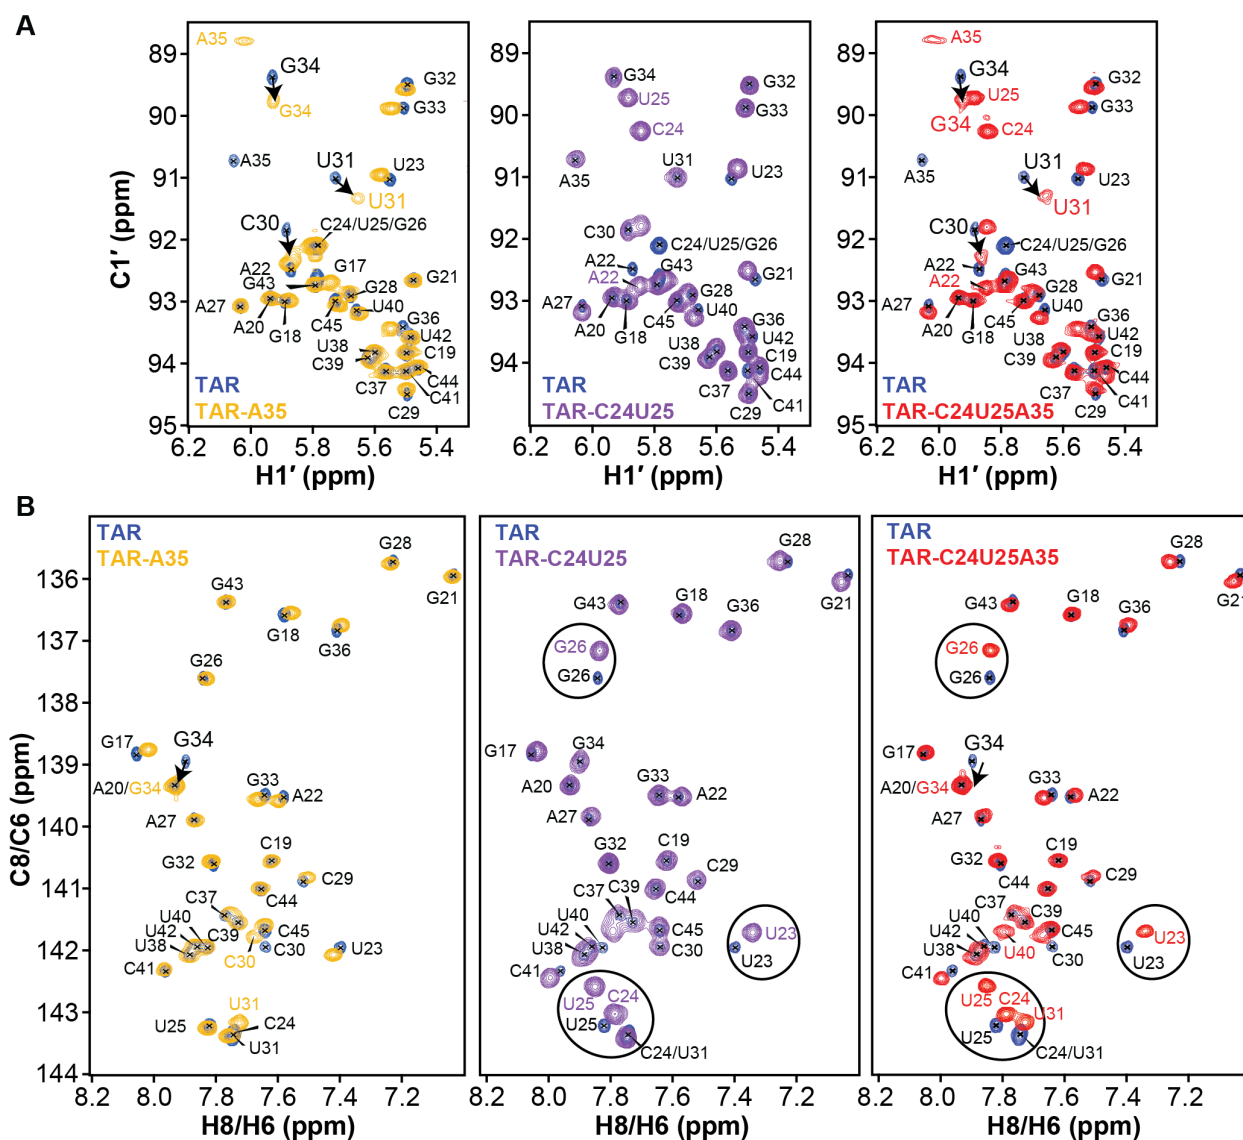

**Figure S6.** Overlay of A) C1'-H1' and B) aromatic region of unlabeled 2D [ $^{13}\text{C}$ ,  $^1\text{H}$ ] HSQC spectra of TAR with either TAR-A35, TAR-C24U25 or TAR-C24U25A35. Black arrows at C30-C1', U31-C1', G34-C1' and G34-C8 in TAR-A35 and TAR-C24U25A35 indicate a shift towards ES1. Black circles around U23-C6, C24-C6, U25-C6 and G26-C8 in TAR-C24U25 or TAR-C24U25A35 indicate a shift in the GS ensemble towards the kinked conformation. Sample conditions: 15 mM  $\text{NaPO}_4$ , 25 mM  $\text{NaCl}$  and 0.1 mM EDTA, pH 6.4, and 25  $^\circ\text{C}$ .

### A ES2 - Mg<sup>2+</sup>

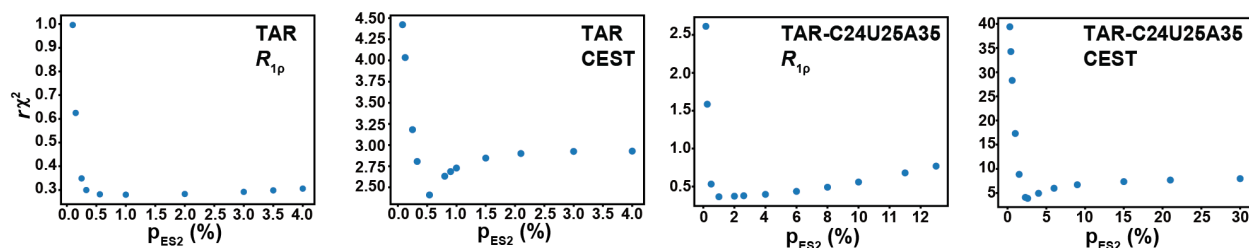

### B ES2 CEST + Mg<sup>2+</sup>

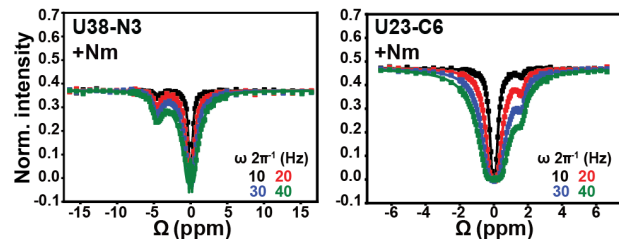

**Figure S7.** Supplementary  $R_{1\rho}$  and CEST data for ES2. A) Uncertainty in exchange parameters obtained from fitting the  $R_{1\rho}$  and CEST data. Shown are plots of reduced  $\chi^2$  ( $r\chi^2$ ) as a function of fixing the population of ES2 to different values for TAR and TAR-C24U25A35 in the absence of Mg<sup>2+</sup>. B) <sup>15</sup>N and <sup>13</sup>C CEST profiles for U23-C6 and U38-N3 for TAR-C24U25A35 (pH 6.4) at 25°C in the presence of 1 mM Mg<sup>2+</sup>.  $\Omega = \omega_{RF} - \omega_{OBS}$ . Spin-lock powers are color-coded.

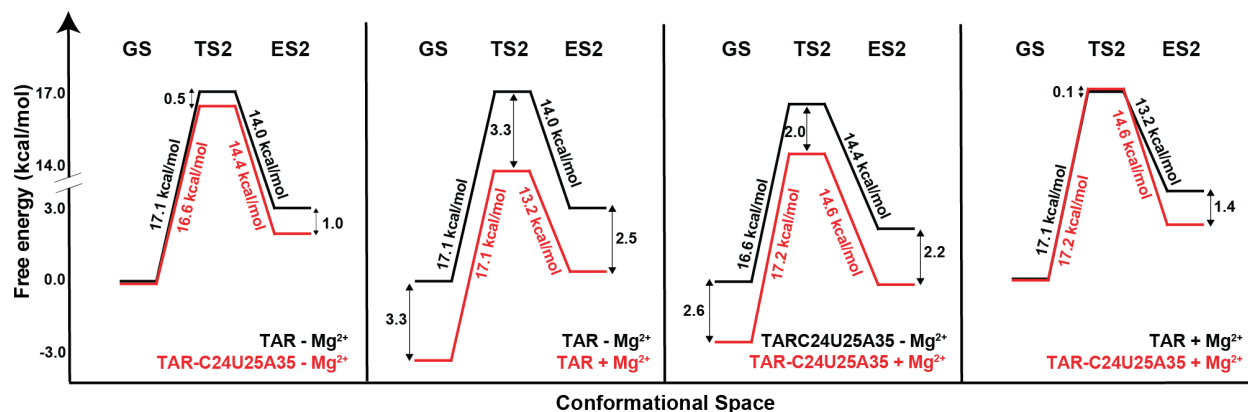

**Figure S8.** Free energy diagrams of GS-ES2 exchange.

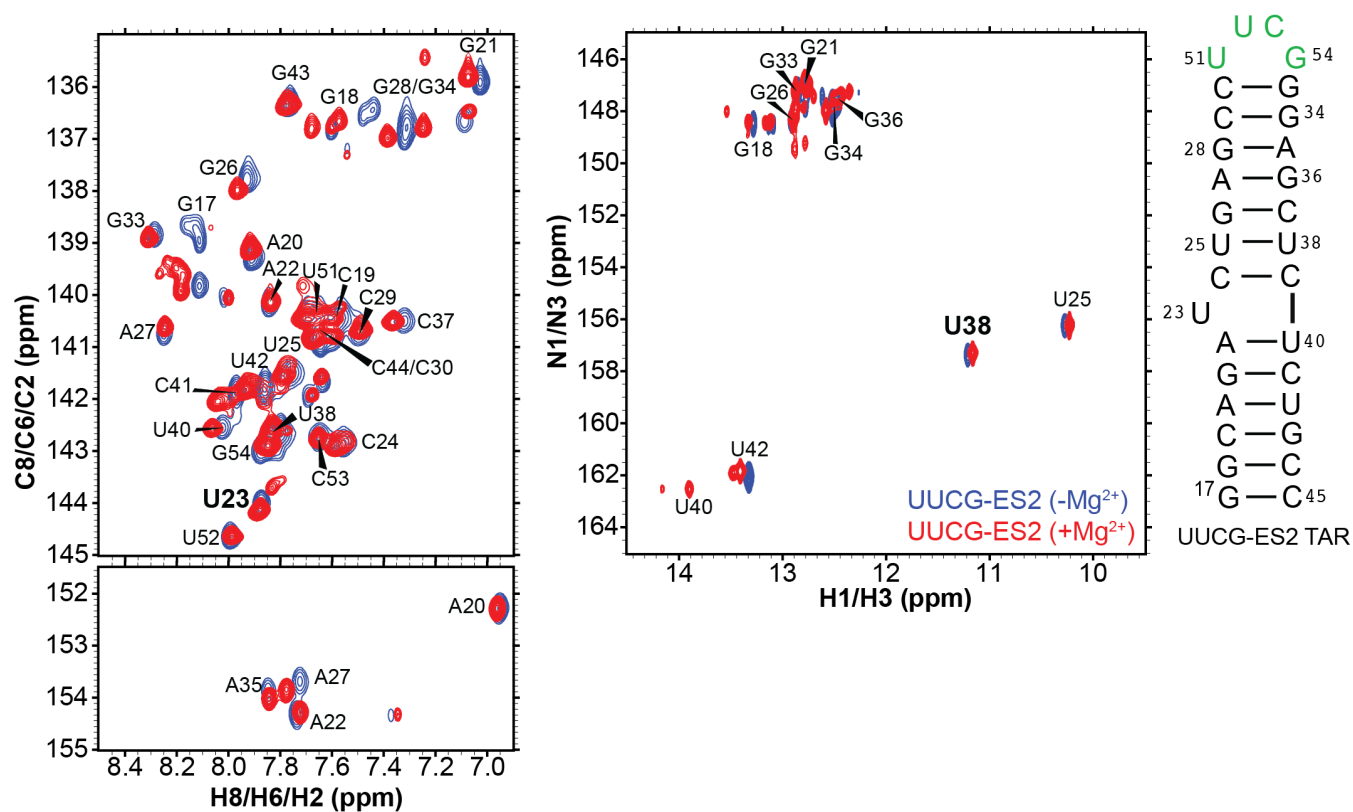

**Figure S9.** The effect of  $Mg^{2+}$  on the chemical shifts of ES2 probes. Overlay of uniformly  $^{13}C/^{15}N$  labeled  $[^{13}C, ^1H]$  and  $[^{15}N, ^1H]$  2D HSQC spectra of UUCG-ES2 mutant (3) in the presence and absence of 1 mM  $Mg^{2+}$ . UUCG-ES2 stabilizes ES2 (3) as the dominant conformation through replacement of the native TAR apical loop with a UUCG loop. The addition of 1 mM  $Mg^{2+}$  does not significantly affect the chemical shifts of the ES2 probes (U23-C6 and U38-N3) used in this study. Sample conditions: 15 mM  $NaPO_4$ , 25 mM  $NaCl$  and 0.1 mM EDTA, pH 6.4, and 25 °C.



## Tables

**Table S1.** Thermodynamic parameters obtained from two-state fitting (in the presence and absence of  $Mg^{2+}$ ), as well as unconstrained and constrained three-state fitting (in the absence of  $Mg^{2+}$ ) of the UV melting data measured for TAR samples.

|                                   | Two-state fitting                       |                                          |                                             |                                             |                                          |                                             |                                          |                                             |
|-----------------------------------|-----------------------------------------|------------------------------------------|---------------------------------------------|---------------------------------------------|------------------------------------------|---------------------------------------------|------------------------------------------|---------------------------------------------|
|                                   | No $Mg^{2+}$                            |                                          |                                             |                                             | + 3 mM $Mg^{2+}$                         |                                             |                                          |                                             |
| Sample                            | $T_m$ (°C)                              | $\Delta H_{melt}^{\circ}$<br>(kcal/mol)  | $T\Delta S_{melt}^{\circ}$<br>(kcal/mol)    | $\Delta G_{melt,37C}^{\circ}$<br>(kcal/mol) | $T_m$ (°C)                               | $\Delta H_{melt}^{\circ}$<br>(kcal/mol)     | $T\Delta S_{melt}^{\circ}$<br>(kcal/mol) | $\Delta G_{melt,37C}^{\circ}$<br>(kcal/mol) |
| TAR                               | 65.2±0.2                                | -62.8±1.1                                | -57.5±1.0                                   | -5.2±0.1                                    | 77.8±0.4                                 | -75.1±2.8                                   | -66.4±2.4                                | -8.7±0.4                                    |
| TAR-A35                           | 65.4±0.2                                | -63.0±0.9                                | -57.7±0.8                                   | -5.3±0.1                                    | 77.6±0.2                                 | -71.7±2.2                                   | -63.4±1.8                                | -8.3±0.2                                    |
| TAR-C24U25A35                     | 65.5±0.1                                | -65.0±2.4                                | -59.5±2.2                                   | -5.5±0.2                                    | 77.5±0.3                                 | -70.0±1.6                                   | -61.9±1.4                                | -8.1±0.1                                    |
| No $Mg^{2+}$                      |                                         |                                          |                                             |                                             |                                          |                                             |                                          |                                             |
| Unconstrained three-state fitting |                                         |                                          |                                             |                                             |                                          |                                             |                                          |                                             |
| Sample                            | $\Delta H_{melt}^{\circ}$<br>(kcal/mol) | $T\Delta S_{melt}^{\circ}$<br>(kcal/mol) | $\Delta G_{melt,37C}^{\circ}$<br>(kcal/mol) | $\Delta H_{conf}^{\circ}$<br>(kcal/mol)     | $T\Delta S_{conf}^{\circ}$<br>(kcal/mol) | $\Delta G_{conf,37C}^{\circ}$<br>(kcal/mol) |                                          |                                             |
| TAR                               | -98.2±47.6                              | -93.9±49.3                               | -4.3±1.7                                    | 45.1±44.4                                   | 43.1±46.9                                | 2.0±4.7                                     |                                          |                                             |
| TAR-A35                           | -99.1±15.3                              | -91.4±14.3                               | -7.7±1.1                                    | 37.5±12.7                                   | 34.9±11.6                                | 2.6±1.3                                     |                                          |                                             |
| TAR-C24U25A35                     | -123.9±11.5                             | -118.1±11.6                              | -5.8±0.1                                    | 54.6±14.5                                   | 54.6±14.4                                | 0.003±0.2                                   |                                          |                                             |
| Constrained three-state fitting   |                                         |                                          |                                             |                                             |                                          |                                             |                                          |                                             |
| TAR (13%)                         | -65.6±3.8                               | -60.2±3.6                                | -5.4±0.2                                    | -51.5±49.6                                  | -54.7±51.6                               | 3.2±2.0                                     |                                          |                                             |
| TAR-A35 (30%)                     | -71.0±2.5                               | -65.4±2.2                                | -5.5±0.3                                    | 5.1±0.8                                     | 4.7±0.8                                  | 0.3±0.03                                    |                                          |                                             |
| TAR-C24U25A35 (30%)               | -97.8±35.5                              | -92.9±36.9                               | -5.1±1.4                                    | 15.2±47.6                                   | 15.3±49.5                                | -0.1±1.9                                    |                                          |                                             |

$\Delta H_{melt}^{\circ}$ ,  $\Delta H_{conf}^{\circ}$ ,  $\Delta S_{melt}^{\circ}$ ,  $\Delta S_{conf}^{\circ}$  refer to the enthalpies and entropies of the annealing and conformational change,  $\Delta G_{melt,37C}^{\circ}$  and  $\Delta G_{conf,37C}^{\circ}$  are the free energies of melting and conformational change respectively, at 37 °C and T is the temperature in Kelvin. For the constrained three-state fit,  $\Delta G_{conf}^{\circ}$  was constrained such that the population of the conformational change was equal to that obtained from  $R_{1p}$  measurements at 25 °C (Table S5, 13% for TAR and 30% for TAR-A35 and TAR-C24U25A35 in the absence of  $Mg^{2+}$ ). The population of ES1 at 25 °C in TAR-A35 was assumed to be the same as that measured by  $R_{1p}$  on TAR-C24U25A35 at 25 °C. Errors were defined as the standard deviation of the respective parameters obtained from triplicate measurements. Buffer conditions are 15 mM  $NaPO_4$ , 25 mM NaCl and 0.1 mM EDTA, with and without 3 mM  $Mg^{2+}$ .

**Table S2.** Comparison of thermodynamic parameters obtained from two-state and unconstrained three-state fitting of the UV melting data for TAR samples in the absence of Mg<sup>2+</sup>.

| Sample        | $\Delta G_{melt,25C}^{\circ}$<br>(two-state)<br>(kcal/mol) | $\Delta G_{melt,25C}^{\circ}$<br>(unconstrained<br>three-state)<br>(kcal/mol) | $\Delta G_{conf,25C}^{\circ}$<br>(unconstrained<br>three-state)<br>(kcal/mol) | $\Delta G_{conf,25C}^{\circ}$<br>( $R_{1\rho}$ )<br>(kcal/mol) | Significant fit |
|---------------|------------------------------------------------------------|-------------------------------------------------------------------------------|-------------------------------------------------------------------------------|----------------------------------------------------------------|-----------------|
| TAR           | -7.5±0.1                                                   | -7.9±0.4                                                                      | 3.7±4.0                                                                       | 1.1                                                            | 2/3-state free* |
| TAR-C24U25A35 | -7.8±0.3                                                   | -10.4±0.3                                                                     | 2.1±0.7                                                                       | 0.5                                                            | 3-state free    |

$\Delta G_{melt,25C}^{\circ}$  and  $\Delta G_{conf,25C}^{\circ}$  denote the free energy of annealing and the conformational change at 25°C, respectively. \*Some of the individual melts of the triplicate set of measurements fit better to a 2-state and the others to a 3-state free fit based on AIC/BIC statistical criteria.

**Table S3.** Perturbations in chemical shifts of A and U upon 2'-O-methylation computed using density functional theory (DFT) calculations.

| Entry |              | A-C8   | A-C2   | A-C1'  | A-C2'   | A-C3'       | A-C4'   | U-C6    | U-C1'   | U-C2'   | U-C3'   | U-C4'  |
|-------|--------------|--------|--------|--------|---------|-------------|---------|---------|---------|---------|---------|--------|
| 1     | rA C3'-endo  | 142.56 | 156.21 | 95.316 | 78.8973 | 70.12<br>77 | 85.4643 |         |         |         |         |        |
| 2     | rU C3'-endo  |        |        |        |         |             |         | 147.234 | 93.9691 | 77.7646 | 69.8541 | 85.629 |
| 3     | rA C2'-endo  | 140.01 | 157.01 | 94.465 | 75.158  | 77.46<br>95 | 89.7878 |         |         |         |         |        |
| 4     | rU C2'-endo  |        |        |        |         |             |         | 145.029 | 94.6564 | 74.5493 | 78.1384 | 88.483 |
| 5     | Am, C3'-endo | 142.71 | 155.96 | 92.459 | 90.5046 | 70.39       | 85.9056 |         |         |         |         |        |
| 6     | Um, C3'-endo |        |        |        |         |             |         | 146.916 | 91.3198 | 89.5421 | 70.1019 | 86.499 |
| 7     | Am, C2'-endo | 140.75 | 156.66 | 92.608 | 83.1558 | 77.28<br>77 | 89.109  |         |         |         |         |        |
| 8     | Um, C2'-endo |        |        |        |         |             |         | 145.555 | 93.7743 | 82.5949 | 77.1266 | 88.861 |

**Table S4.** Population of ES1 derived from chemical shift perturbation analysis.

| Resonance  | Shift toward ES1 (%) |               |                        |               |
|------------|----------------------|---------------|------------------------|---------------|
|            | -Mg <sup>2+</sup>    |               | +1 mM Mg <sup>2+</sup> |               |
|            | TAR-A35              | TAR-C24U24A35 | TAR                    | TAR-C24U24A35 |
| C30C1'-H1' | 30.5                 | 34.1          |                        |               |
| U31C1'-H1' | 28.7                 | 27.1          |                        |               |
| U31C6-H6   | 27.5                 | 27.7          |                        |               |
| G34C1'-H1' | 29.7                 | 29.2          |                        |               |
| G34C8-H8   | 27.0                 | 26.1          | 7.3                    | 14.5          |
| Average    | 28.7                 | 28.8          |                        |               |
| STDEV      | 1.5                  | 3.1           |                        |               |

**Table S5.** Exchange parameters for ES1 from fitting  $R_{1\rho}$  data for G34-C8 at 25 °C.

|                                                | $R_1$ (Hz)       | $R_2$ (Hz)        | $p_{ES1}$ (%)      | $\Delta\omega$ (ppm) | $k_{ex}$ (s <sup>-1</sup> ) | $k_1$ (s <sup>-1</sup> ) | $k_{-1}$ (s <sup>-1</sup> ) | $\tau$ ( $\mu$ s) | $\Delta G^\circ$ (kcal/mol) |
|------------------------------------------------|------------------|-------------------|--------------------|----------------------|-----------------------------|--------------------------|-----------------------------|-------------------|-----------------------------|
| 1) TAR -Mg <sup>2+</sup><br>from (1)           | 2.3<br>$\pm 0.1$ | 22.3<br>$\pm 1.2$ | 13.0<br>$\pm 2.0$  | 2.6<br>$\pm 0.2$     | 25807<br>$\pm 716$          | 3436<br>$\pm 509$        | 22371<br>$\pm 1771$         | 45<br>$\pm 4$     | 1.1<br>$\pm 0.1$            |
| 2) TAR<br>-Mg <sup>2+</sup>                    | 3.4<br>$\pm 0.3$ | 28.9<br>$\pm 5.6$ | 21.9<br>$\pm 10.0$ | 2.6<br>$\pm 0.5$     | 32248<br>$\pm 4214$         | 7055<br>$\pm 2839$       | 25193<br>$\pm 4248$         | 40<br>$\pm 7$     | 0.75<br>$\pm 0.3$           |
| 3) TAR<br>-Mg <sup>2+</sup>                    | 3.3<br>$\pm 0.2$ | 31.3<br>$\pm 4.4$ | 13*                | 3.0<br>$\pm 0.4$     | 30531<br>$\pm 3484$         | 3969<br>$\pm 3521$       | 26562<br>$\pm 4624$         | 38<br>$\pm 7$     | 1.1                         |
| 4) TAR-<br>C24U25A35<br>-Mg <sup>2+</sup>      | 1.2<br>$\pm 0.4$ | 32.6<br>$\pm 2.1$ | 30.3<br>$\pm 6.0$  | 2.4<br>$\pm 0.2$     | 15874<br>$\pm 613$          | 4816<br>$\pm 752$        | 11059<br>$\pm 848$          | 90<br>$\pm 7$     | 0.5<br>$\pm 0.1$            |
| 5) TAR-<br>C24U25A35<br>-Mg <sup>2+</sup>      | 1.2<br>$\pm 0.4$ | 32.7<br>$\pm 2.1$ | 29**               | 2.4<br>$\pm 0.1$     | 15852<br>$\pm 613$          | 4597<br>$\pm 3530$       | 11255<br>$\pm 3553$         | 89<br>$\pm 28$    | 0.5**                       |
| 6) TAR<br>+1 mM Mg <sup>2+</sup>               | 2.6<br>$\pm 0.2$ | 37.3<br>$\pm 2.6$ | 7.0**              | 2.9<br>$\pm 0.3$     | 23516<br>$\pm 2685$         | 1646<br>$\pm 1547$       | 21870<br>$\pm 2932$         | 46<br>$\pm 6$     | 1.5**                       |
| 7) TAR-<br>C24U25A35<br>+1 mM Mg <sup>2+</sup> | 2.1<br>$\pm 0.2$ | 37.2<br>$\pm 1.1$ | 14.1<br>$\pm 2.8$  | 2.5<br>$\pm 0.2$     | 15098<br>$\pm 487$          | 2122<br>$\pm 372$        | 12976<br>$\pm 556$          | 77<br>$\pm 3$     | 1.1<br>$\pm 0.1$            |

\*values fixed while fitting the data, these values are obtained from previously published results (1)

\*\* $p_{ES1}$  from chemical shift perturbation analysis in 2D HSQC NMR and the corresponding  $\Delta G^\circ$  is calculated based on the following equation:  $RT \ln[p_{ES1}/(1-p_{ES1})]$

**Table S6.** Free energy values calculated for TS1 and TS2.

| ES  | Condition                        | $\Delta^+G^\circ$ kcal/mol |
|-----|----------------------------------|----------------------------|
| ES1 | TAR                              | 12.6 $\pm$ 0.1             |
|     | TAR-C24U25A35                    | 12.4 $\pm$ 0.1             |
|     | TAR + Mg <sup>2+</sup>           | 13.1 $\pm$ 0.6             |
|     | TAR-C24U25A35 + Mg <sup>2+</sup> | 12.9 $\pm$ 0.1             |
| ES2 | TAR                              | 17.06 $\pm$ 0.04           |
|     | TAR-C24U25A35                    | 16.56 $\pm$ 0.01           |
|     | TAR + Mg <sup>2+</sup>           | 17.06 $\pm$ 0.14           |
|     | TAR-C24U25A35 + Mg <sup>2+</sup> | 17.15 $\pm$ 0.03           |

**Table S7.** Phi-values for Nm-modified TAR in the absence and presence of Mg<sup>2+</sup>.

| ES  | Sample                           | $\Phi$            |
|-----|----------------------------------|-------------------|
| ES1 | TAR-C24U25A35                    | 0.33 $\pm$ 0.25   |
|     | TAR-C24U25A35 + Mg <sup>2+</sup> | 0.5 $\pm$ 1.6*    |
| ES2 | TAR-C24U25A35                    | 0.53 $\pm$ 0.04   |
|     | TAR-C24U25A35 + Mg <sup>2+</sup> | -0.07 $\pm$ 0.10* |

\*Phi-value calculated for TAR-C24U25A35 in the presence of Mg<sup>2+</sup> with TAR in Mg<sup>2+</sup> as a reference.

**Table S8A.** Comparison of ES2 exchange parameters for TAR and TAR-C24U25A35 obtained from fitting CEST and  $R_{1\rho}$  data in the absence of  $Mg^{2+}$ .

|                             | R1 (Hz)              | R2 (Hz)             | $p_{ES2}$ (%)      | $\Delta\omega$ (ppm)  | $k_{ex}$ ( $s^{-1}$ ) | $k_1$ ( $s^{-1}$ ) | $k_{-1}$ ( $s^{-1}$ ) | $\tau$ (ms)        | $\Delta G^\circ$ (kcal/mol) |                    |
|-----------------------------|----------------------|---------------------|--------------------|-----------------------|-----------------------|--------------------|-----------------------|--------------------|-----------------------------|--------------------|
| TAR U23-C6 from (3)         | 2.50<br>$\pm 0.04$   | 30.7<br>$\pm 0.1$   | 0.40<br>$\pm 0.05$ | 2.3<br>$\pm 0.1$      | 474<br>$\pm 69$       | 1.9<br>$\pm 0.4$   | 472<br>$\pm 70$       | 2.1<br>$\pm 0.3$   | 3.26<br>$\pm 0.07$          |                    |
| TAR U38-N3 from (3)         | 1.40<br>$\pm 0.03$   | 6.20<br>$\pm 0.03$  |                    | -5.2<br>$\pm 0.2$     |                       |                    |                       |                    |                             |                    |
| TAR CEST (U23-C6)           | 2.702<br>$\pm 0.004$ | 30.38<br>$\pm 0.19$ | 0.54<br>$\pm 0.01$ | 2.07<br>$\pm 0.02$    | 356<br>$\pm 23$       | 1.92<br>$\pm 0.13$ | 354<br>$\pm 23$       | 2.8<br>$\pm 0.2$   | 3.09<br>$\pm 0.01$          |                    |
| TAR CEST (U38-N3)           | 3.111<br>$\pm 0.005$ | 9.90<br>$\pm 0.13$  |                    | -5.12<br>$\pm 0.06$   |                       |                    |                       |                    |                             |                    |
| TAR RD (U23-C6)             | 2.71<br>$\pm 0.07$   | 30.07<br>$\pm 0.09$ | 0.54*              | 2.32<br>$\pm 0.13$    | 431<br>$\pm 15$       | 2.3<br>$\pm 2.3$   | 429<br>$\pm 15$       | 2.33<br>$\pm 0.08$ |                             |                    |
| TAR RD (U38-N3)             | 2.03<br>$\pm 0.02$   | 6.29<br>$\pm 0.02$  |                    | -4.89<br>$\pm 0.13$   |                       |                    |                       |                    |                             |                    |
| TAR-C24U25A35 CEST (U23-C6) | 2.538<br>$\pm 0.003$ | 31.15<br>$\pm 0.14$ | 2.60<br>$\pm 0.03$ | 2.142<br>$\pm 0.003$  | 171<br>$\pm 3$        | 4.45<br>$\pm 0.09$ | 167<br>$\pm 3$        | 6.0<br>$\pm 0.1$   |                             | 2.15<br>$\pm 0.01$ |
| TAR-C24U25A35 CEST (U38-N3) | 3.458<br>$\pm 0.004$ | 10.21<br>$\pm 0.08$ |                    | -4.877<br>$\pm 0.009$ |                       |                    |                       |                    |                             |                    |
| TAR-C24U25A35 RD (U23-C6)   | 2.9<br>$\pm 0.1$     | 33.53<br>$\pm 0.13$ | 2.6*               | 2.25<br>$\pm 0.08$    | 174<br>$\pm 5$        | 4.5<br>$\pm 4.4$   | 170<br>$\pm 6$        | 5.9<br>$\pm 0.2$   |                             |                    |
| TAR-C24U25A35 RD (U38-N3)   | 2.15<br>$\pm 0.03$   | 6.68<br>$\pm 0.03$  |                    | -4.56<br>$\pm 0.09$   |                       |                    |                       |                    |                             |                    |

\*  $R_{1\rho}$  RD data was fit by fixing the population to the values determined by CEST.

**Table S8B.** Comparison of ES2 exchange parameters for TAR and TAR-C24U25A35 in the presence of 1 mM  $Mg^{2+}$  obtained from fitting CEST and  $R_{1\rho}$  data.

|                             | R1 (Hz)              | R2 (Hz)             | $p_{ES2}$ (%)      | $\Delta\omega$ (ppm) | $k_{ex}$ ( $s^{-1}$ ) | $k_1$ ( $s^{-1}$ ) | $k_{-1}$ ( $s^{-1}$ ) | $\tau$ (ms)        | $\Delta G^\circ$ (kcal/mol) |
|-----------------------------|----------------------|---------------------|--------------------|----------------------|-----------------------|--------------------|-----------------------|--------------------|-----------------------------|
| TAR RD (U38-N3)             | 2.02<br>$\pm 0.03$   | 6.62<br>$\pm 0.05$  | 0.14<br>$\pm 0.02$ | -4.4<br>$\pm 0.5$    | 1367<br>$\pm 267$     | 1.92<br>$\pm 0.47$ | 1365<br>$\pm 266$     | 0.73<br>$\pm 0.14$ | 3.89<br>$\pm 0.19$          |
| TAR-C24U25A35 CEST (U23-C6) | 2.459<br>$\pm 0.003$ | 39.25<br>$\pm 0.17$ | 1.39<br>$\pm 0.03$ | 1.631<br>$\pm 0.004$ | 118<br>$\pm 4$        | 1.65<br>$\pm 0.07$ | 116<br>$\pm 4$        | 8.6<br>$\pm 0.3$   | 2.52<br>$\pm 0.01$          |
| TAR-C24U25A35 CEST (U38-N3) | 3.255<br>$\pm 0.003$ | 10.49<br>$\pm 0.07$ |                    | -4.66<br>$\pm 0.01$  |                       |                    |                       |                    |                             |
| TAR-C24U25A35 RD (U23-C6)   | 2.6<br>$\pm 0.1$     | 41.66<br>$\pm 0.13$ | 1.4*               | 2.0<br>$\pm 0.2$     | 117<br>$\pm 5$        | 1.6<br>$\pm 1.6$   | 116<br>$\pm 5$        | 8.6<br>$\pm 0.4$   |                             |
| TAR-C24U25A35 RD (U38-N3)   | 1.96<br>$\pm 0.02$   | 7.14<br>$\pm 0.02$  |                    | -4.43<br>$\pm 0.15$  |                       |                    |                       |                    |                             |

\*  $R_{1\rho}$  RD data for TAR-C24U25A35 was fit by fixing the population to the values determined by CEST.

**Table S9.** Spin-lock power and offsets used in the  $R_{1\rho}$  measurements.

| construct                          | Nuclei | [spin-lock power] {offset frequencies}/[ $\omega_1$ $2\pi^{-1}(s^{-1})$ ] { $\Omega$ $2\pi^{-1}(s^{-1})$ }                                                                                                        |
|------------------------------------|--------|-------------------------------------------------------------------------------------------------------------------------------------------------------------------------------------------------------------------|
| TAR (-Mg <sup>2+</sup> )           | U23-C6 | [50, 100, 150, 200, 250, 300, 350, 400, 500, 600, 700, 800, 900, 1000, 1200, 1400, 1600, 1800, 2000, 2500] {0}                                                                                                    |
|                                    |        | [200] {-800, -700, -600, -540, -480, -420, -390, -360, -330, -300, -270, -240, -210, -180, -150, -120, -90, -60, -30, 30, 60, 90, 120, 150, 180, 210, 240, 270, 300, 330, 360, 390, 420, 480, 540, 600, 700, 800} |
|                                    |        | [400] {-1500, -1200, -1000, -900, -800, -700, -600, -550, -500, -450, -400, -350, -300, -250, -200, -150, -100, -50, 50, 100, 150, 200, 250, 300, 350, 400, 450, 500, 550, 600, 700, 800, 900, 1000, 1200, 1500}  |
|                                    |        | [600] {-1600, -1400, -1200, -1000, -800, -650, -550, -450, -375, -300, -225, -150, -75, 75, 150, 225, 300, 375, 450, 550, 650, 800, 1000, 1200, 1400, 1600}                                                       |
|                                    |        | [1000] {-1700, -1500, -1300, -1100, -900, -700, -500, -400, -300, -200, -100, 100, 200, 300, 400, 500, 700, 900, 1100, 1300, 1500, 1700}                                                                          |
|                                    | U38-N3 | [100, 150, 200, 250, 300, 350, 400, 450, 500, 500, 600, 700, 800, 900, 1000, 1200, 1400, 1600, 1800, 2000] {0}                                                                                                    |
|                                    |        | [200] {-500, -400, -350, -300, -250, -225, -200, -180, -160, -140, -120, -100, -80, -60, -40, -20, 20, 40, 60, 80, 100, 120, 140, 160, 180, 200, 225, 250, 300, 350, 400, 500}                                    |
|                                    |        | [400] {-1000, -800, -700, -600, -500, -400, -350, -300, -250, -210, -180, -150, -120, -90, -60, -30, 30, 60, 90, 120, 150, 180, 210, 250, 300, 350, 400, 500, 600, 700, 800, 1000}                                |
|                                    |        | [600] {-1600, -1400, -1200, -1000, -800, -600, -500, -400, -300, -240, -200, -160, -120, -80, -40, 40, 80, 120, 160, 200, 240, 300, 400, 500, 600, 800, 1000, 1200, 1400, 1600}                                   |
|                                    |        | [1000] {-3000, -2500, -2000, -1500, -1300, -1100, -900, -700, -600, -500, -400, -300, -200, -100, 100, 200, 300, 400, 500, 600, 700, 900, 1100, 1300, 1500, 2000, 2500, 3000}                                     |
| TAR-C24U25A35 (-Mg <sup>2+</sup> ) | U23-C6 | [200, 250, 300, 350, 400, 500, 600, 700, 800, 900, 1000, 1200, 1400, 1600, 1800, 2000, 2500] {0}                                                                                                                  |
|                                    |        | [200] {-800, -700, -600, -540, -480, -420, -390, -360, -330, -300, -270, -240, -210, -180, -150, -120, -90, -60, -30, 30, 60, 90, 120, 150, 180, 210, 240, 270, 300, 330, 360, 390, 420, 480, 540, 600, 700, 800} |
|                                    |        | [400] {-1500, -1200, -1000, -900, -800, -700, -600, -550, -500, -450, -400, -350, -300, -250, -200, -150, -100, -50, 50, 100, 150, 200, 250, 300, 350, 400, 450, 500, 550, 600, 700, 800, 900, 1000, 1200, 1500}  |
|                                    |        | [600] {-1600, -1400, -1200, -1000, -800, -650, -550, -450, -375, -300, -225, -150, -75, 75, 150, 225, 300, 375, 450, 550, 650, 800, 1000, 1200, 1400, 1600}                                                       |
|                                    |        | [1000] {-1700, -1500, -1300, -1100, -900, -700, -500, -400, -300, -200, -100, 100, 200, 300, 400, 500, 700, 900, 1100, 1300, 1500, 1700}                                                                          |
|                                    | U38-N3 | [100, 150, 200, 250, 300, 350, 400, 450, 500, 500, 600, 700, 800, 900, 1000, 1200, 1400, 1600, 1800, 2000] {0}                                                                                                    |
|                                    |        | [200] {-500, -400, -350, -300, -250, -225, -200, -180, -160, -140, -120, -100, -80, -60, -40, -20, 20, 40, 60, 80, 100, 120, 140, 160, 180, 200, 225, 250, 300, 350, 400, 500}                                    |
|                                    |        | [400] {-1000, -800, -700, -600, -500, -400, -350, -300, -250, -210, -180, -150, -120, -90, -60, -30, 30, 60, 90, 120, 150, 180, 210, 250, 300, 350, 400, 500, 600, 700, 800, 1000}                                |
|                                    |        | [600] {-1600, -1400, -1200, -1000, -800, -600, -500, -400, -300, -240, -200, -160, -120, -80, -40, 40, 80, 120, 160, 200, 240, 300, 400, 500, 600, 800, 1000, 1200, 1400, 1600}                                   |
|                                    |        | [1000] {-3000, -2500, -2000, -1500, -1300, -1100, -900, -700, -600, -500, -400, -300, -200, -100, 100, 200, 300, 400, 500, 600, 700, 900, 1100, 1300, 1500, 2000, 2500, 3000}                                     |
| TAR (+Mg <sup>2+</sup> )           | U38-N3 | [100, 150, 200, 250, 300, 350, 400, 450, 500, 500, 600, 700, 800, 900, 1000, 1200, 1400, 1600, 1800, 2000] {0}                                                                                                    |

|                                           |        |                                                                                                                                                                                                                   |
|-------------------------------------------|--------|-------------------------------------------------------------------------------------------------------------------------------------------------------------------------------------------------------------------|
|                                           |        | [200] {-500, -400, -350, -300, -250, -225, -200, -180, -160, -140, -120, -100, -80, -60, -40, -20, 20, 40, 60, 80, 100, 120, 140, 160, 180, 200, 225, 250, 300, 350, 400, 500}                                    |
|                                           |        | [400] {-1000, -800, -700, -600, -500, -400, -350, -300, -250, -210, -180, -150, -120, -90, -60, -30, 30, 60, 90, 120, 150, 180, 210, 250, 300, 350, 400, 500, 600, 700, 800, 1000}                                |
|                                           |        | [600] {-1600, -1400, -1200, -1000, -800, -600, -500, -400, -300, -240, -200, -160, -120, -80, -40, 40, 80, 120, 160, 200, 240, 300, 400, 500, 600, 800, 1000, 1200, 1400, 1600}                                   |
|                                           |        | [1000] {-3000, -2500, -2000, -1500, -1300, -1100, -900, -700, -600, -500, -400, -300, -200, -100, 100, 200, 300, 400, 500, 600, 700, 900, 1100, 1300, 1500, 2000, 2500, 3000}                                     |
| TAR-<br>C24U25A35<br>(+Mg <sup>2+</sup> ) | U23-C6 | [50, 100, 150, 200, 250, 300, 350, 400, 500, 600, 700, 800, 900, 1000, 1200, 1400, 1600, 1800, 2000, 2500] {0}                                                                                                    |
|                                           |        | [200] {-800, -700, -600, -540, -480, -420, -390, -360, -330, -300, -270, -240, -210, -180, -150, -120, -90, -60, -30, 30, 60, 90, 120, 150, 180, 210, 240, 270, 300, 330, 360, 390, 420, 480, 540, 600, 700, 800} |
|                                           |        | [400] {-1500, -1200, -1000, -900, -800, -700, -600, -550, -500, -450, -400, -350, -300, -250, -200, -150, -100, -50, 50, 100, 150, 200, 250, 300, 350, 400, 450, 500, 550, 600, 700, 800, 900, 1000, 1200, 1500}  |
|                                           |        | [600] {-1600, -1400, -1200, -1000, -800, -650, -550, -450, -375, -300, -225, -150, -75, 75, 150, 225, 300, 375, 450, 550, 650, 800, 1000, 1200, 1400, 1600}                                                       |
|                                           |        | [1000] {-1700, -1500, -1300, -1100, -900, -700, -500, -400, -300, -200, -100, 100, 200, 300, 400, 500, 700, 900, 1100, 1300, 1500, 1700}                                                                          |
|                                           | U38-N3 | [100, 150, 200, 250, 300, 350, 400, 450, 500, 500, 600, 700, 800, 900, 1000, 1200, 1400, 1600, 1800, 2000] {0}                                                                                                    |
|                                           |        | [200] {-500, -400, -350, -300, -250, -225, -200, -180, -160, -140, -120, -100, -80, -60, -40, -20, 20, 40, 60, 80, 100, 120, 140, 160, 180, 200, 225, 250, 300, 350, 400, 500}                                    |
|                                           |        | [400] {-1000, -800, -700, -600, -500, -400, -350, -300, -250, -210, -180, -150, -120, -90, -60, -30, 30, 60, 90, 120, 150, 180, 210, 250, 300, 350, 400, 500, 600, 700, 800, 1000}                                |
|                                           |        | [600] {-1600, -1400, -1200, -1000, -800, -600, -500, -400, -300, -240, -200, -160, -120, -80, -40, 40, 80, 120, 160, 200, 240, 300, 400, 500, 600, 800, 1000, 1200, 1400, 1600}                                   |
|                                           |        | [1000] {-3000, -2500, -2000, -1500, -1300, -1100, -900, -700, -600, -500, -400, -300, -200, -100, 100, 200, 300, 400, 500, 600, 700, 900, 1100, 1300, 1500, 2000, 2500, 3000}                                     |

**Table S10.** Spin-lock power and offsets used in the CEST measurements.

| construct                   | Nuclei | [spin-lock power] {offset frequencies}                                                                                                                                                                                                                                                                                                                                                                                                                                                                                                                                                                                                                                                                                                                                  |
|-----------------------------|--------|-------------------------------------------------------------------------------------------------------------------------------------------------------------------------------------------------------------------------------------------------------------------------------------------------------------------------------------------------------------------------------------------------------------------------------------------------------------------------------------------------------------------------------------------------------------------------------------------------------------------------------------------------------------------------------------------------------------------------------------------------------------------------|
|                             |        | $[\omega_1 \text{ 2}\pi^{-1}(\text{s}^{-1})] \{\Omega \text{ 2}\pi^{-1}(\text{s}^{-1})\}$                                                                                                                                                                                                                                                                                                                                                                                                                                                                                                                                                                                                                                                                               |
| TAR<br>(-Mg <sup>2+</sup> ) | U23-C6 | [10] {-1000.0, -922.2, -844.4, -766.7, -688.9, -611.1, -533.3, -455.6, -377.8, -300.0, -300.0, -289.9, -279.7, -269.6, -259.5, -249.4, -239.2, -229.1, -219.0, -208.9, -198.7, -188.6, -178.5, -168.4, -158.2, -148.1, -138.0, -127.8, -117.7, -107.6, -97.5, -87.3, -77.2, -67.1, -57.0, -46.8, -36.7, -26.6, -16.5, -6.3, 3.8, 13.9, 24.1, 34.2, 44.3, 54.4, 64.6, 74.7, 84.8, 94.9, 105.1, 115.2, 125.3, 135.4, 145.6, 155.7, 165.8, 175.9, 186.1, 196.2, 206.3, 216.5, 226.6, 236.7, 246.8, 257.0, 267.1, 277.2, 287.3, 297.5, 307.6, 317.7, 327.8, 338.0, 348.1, 358.2, 368.4, 378.5, 388.6, 398.7, 408.9, 419.0, 429.1, 439.2, 449.4, 459.5, 469.6, 479.7, 489.9, 500.0, 500.0, 555.6, 611.1, 666.7, 722.2, 777.8, 833.3, 888.9, 944.4, 1000.0}                   |
|                             |        | [20] {-1000.0, -922.2, -844.4, -766.7, -688.9, -611.1, -533.3, -455.6, -377.8, -300.0, -300.0, -289.9, -279.7, -269.6, -259.5, -249.4, -239.2, -229.1, -219.0, -208.9, -198.7, -188.6, -178.5, -168.4, -158.2, -148.1, -138.0, -127.8, -117.7, -107.6, -97.5, -87.3, -77.2, -67.1, -57.0, -46.8, -36.7, -26.6, -16.5, -6.3, 3.8, 13.9, 24.1, 34.2, 44.3, 54.4, 64.6, 74.7, 84.8, 94.9, 105.1, 115.2, 125.3, 135.4, 145.6, 155.7, 165.8, 175.9, 186.1, 196.2, 206.3, 216.5, 226.6, 236.7, 246.8, 257.0, 267.1, 277.2, 287.3, 297.5, 307.6, 317.7, 327.8, 338.0, 348.1, 358.2, 368.4, 378.5, 388.6, 398.7, 408.9, 419.0, 429.1, 439.2, 449.4, 459.5, 469.6, 479.7, 489.9, 500.0, 500.0, 555.6, 611.1, 666.7, 722.2, 777.8, 833.3, 888.9, 944.4, 1000.0}                   |
|                             |        | [30] {-1000.0, -922.2, -844.4, -766.7, -688.9, -611.1, -533.3, -455.6, -377.8, -300.0, -300.0, -289.9, -279.7, -269.6, -259.5, -249.4, -239.2, -229.1, -219.0, -208.9, -198.7, -188.6, -178.5, -168.4, -158.2, -148.1, -138.0, -127.8, -117.7, -107.6, -97.5, -87.3, -77.2, -67.1, -57.0, -46.8, -36.7, -26.6, -16.5, -6.3, 3.8, 13.9, 24.1, 34.2, 44.3, 54.4, 64.6, 74.7, 84.8, 94.9, 105.1, 115.2, 125.3, 135.4, 145.6, 155.7, 165.8, 175.9, 186.1, 196.2, 206.3, 216.5, 226.6, 236.7, 246.8, 257.0, 267.1, 277.2, 287.3, 297.5, 307.6, 317.7, 327.8, 338.0, 348.1, 358.2, 368.4, 378.5, 388.6, 398.7, 408.9, 419.0, 429.1, 439.2, 449.4, 459.5, 469.6, 479.7, 489.9, 500.0, 500.0, 555.6, 611.1, 666.7, 722.2, 777.8, 833.3, 888.9, 944.4, 1000.0}                   |
|                             |        | [40] {-1000.0, -922.2, -844.4, -766.7, -688.9, -611.1, -533.3, -455.6, -377.8, -300.0, -300.0, -289.9, -279.7, -269.6, -259.5, -249.4, -239.2, -229.1, -219.0, -208.9, -198.7, -188.6, -178.5, -168.4, -158.2, -148.1, -138.0, -127.8, -117.7, -107.6, -97.5, -87.3, -77.2, -67.1, -57.0, -46.8, -36.7, -26.6, -16.5, -6.3, 3.8, 13.9, 24.1, 34.2, 44.3, 54.4, 64.6, 74.7, 84.8, 94.9, 105.1, 115.2, 125.3, 135.4, 145.6, 155.7, 165.8, 175.9, 186.1, 196.2, 206.3, 216.5, 226.6, 236.7, 246.8, 257.0, 267.1, 277.2, 287.3, 297.5, 307.6, 317.7, 327.8, 338.0, 348.1, 358.2, 368.4, 378.5, 388.6, 398.7, 408.9, 419.0, 429.1, 439.2, 449.4, 459.5, 469.6, 479.7, 489.9, 500.0, 500.0, 555.6, 611.1, 666.7, 722.2, 777.8, 833.3, 888.9, 944.4, 1000.0}                   |
| TAR<br>(-Mg <sup>2+</sup> ) | U38-N3 | [10] {-800.0, -766.7, -733.3, -700.0, -666.7, -633.3, -600.0, -566.7, -533.3, -500.0, -500.0, -489.9, -479.7, -469.6, -459.5, -449.4, -439.2, -429.1, -419.0, -408.9, -398.7, -388.6, -378.5, -368.4, -358.2, -348.1, -338.0, -327.8, -317.7, -307.6, -297.5, -287.3, -277.2, -267.1, -257.0, -246.8, -236.7, -226.6, -216.5, -206.3, -196.2, -186.1, -175.9, -165.8, -155.7, -145.6, -135.4, -125.3, -115.2, -105.1, -94.9, -84.8, -74.7, -64.6, -54.4, -44.3, -34.2, -24.1, -13.9, -3.8, 6.3, 16.5, 26.6, 36.7, 46.8, 57.0, 67.1, 77.2, 87.3, 97.5, 107.6, 117.7, 127.8, 138.0, 148.1, 158.2, 168.4, 178.5, 188.6, 198.7, 208.9, 219.0, 229.1, 239.2, 249.4, 259.5, 269.6, 279.7, 289.9, 300.0, 300.0, 333.3, 366.7, 400.0, 433.3, 466.7, 500.0, 533.3, 566.7, 600.0} |
|                             |        | [20] {-800.0, -766.7, -733.3, -700.0, -666.7, -633.3, -600.0, -566.7, -533.3, -500.0, -500.0, -489.9, -479.7, -469.6, -459.5, -449.4, -439.2, -429.1, -419.0, -408.9, -398.7, -388.6, -378.5, -368.4, -358.2, -348.1, -338.0, -327.8, -                                                                                                                                                                                                                                                                                                                                                                                                                                                                                                                                 |

|                                             |               |                                                                                                                                                                                                                                                                                                                                                                                                                                                                                                                                                                                                                                                                                                                                                                                |
|---------------------------------------------|---------------|--------------------------------------------------------------------------------------------------------------------------------------------------------------------------------------------------------------------------------------------------------------------------------------------------------------------------------------------------------------------------------------------------------------------------------------------------------------------------------------------------------------------------------------------------------------------------------------------------------------------------------------------------------------------------------------------------------------------------------------------------------------------------------|
|                                             |               | <p>317.7, -307.6, -297.5, -287.3, -277.2, -267.1, -257.0, -246.8, -236.7, -226.6, -216.5, -206.3, -196.2, -186.1, -175.9, -165.8, -155.7, -145.6, -135.4, -125.3, -115.2, -105.1, -94.9, -84.8, -74.7, -64.6, -54.4, -44.3, -34.2, -24.1, -13.9, -3.8, 6.3, 16.5, 26.6, 36.7, 46.8, 57.0, 67.1, 77.2, 87.3, 97.5, 107.6, 117.7, 127.8, 138.0, 148.1, 158.2, 168.4, 178.5, 188.6, 198.7, 208.9, 219.0, 229.1, 239.2, 249.4, 259.5, 269.6, 279.7, 289.9, 300.0, 300.0, 333.3, 366.7, 400.0, 433.3, 466.7, 500.0, 533.3, 566.7, 600.0}</p>                                                                                                                                                                                                                                        |
|                                             |               | <p>[30] {-800.0, -766.7, -733.3, -700.0, -666.7, -633.3, -600.0, -566.7, -533.3, -500.0, -500.0, -489.9, -479.7, -469.6, -459.5, -449.4, -439.2, -429.1, -419.0, -408.9, -398.7, -388.6, -378.5, -368.4, -358.2, -348.1, -338.0, -327.8, -317.7, -307.6, -297.5, -287.3, -277.2, -267.1, -257.0, -246.8, -236.7, -226.6, -216.5, -206.3, -196.2, -186.1, -175.9, -165.8, -155.7, -145.6, -135.4, -125.3, -115.2, -105.1, -94.9, -84.8, -74.7, -64.6, -54.4, -44.3, -34.2, -24.1, -13.9, -3.8, 6.3, 16.5, 26.6, 36.7, 46.8, 57.0, 67.1, 77.2, 87.3, 97.5, 107.6, 117.7, 127.8, 138.0, 148.1, 158.2, 168.4, 178.5, 188.6, 198.7, 208.9, 219.0, 229.1, 239.2, 249.4, 259.5, 269.6, 279.7, 289.9, 300.0, 300.0, 333.3, 366.7, 400.0, 433.3, 466.7, 500.0, 533.3, 566.7, 600.0}</p> |
|                                             |               | <p>[40] {-800.0, -766.7, -733.3, -700.0, -666.7, -633.3, -600.0, -566.7, -533.3, -500.0, -500.0, -489.9, -479.7, -469.6, -459.5, -449.4, -439.2, -429.1, -419.0, -408.9, -398.7, -388.6, -378.5, -368.4, -358.2, -348.1, -338.0, -327.8, -317.7, -307.6, -297.5, -287.3, -277.2, -267.1, -257.0, -246.8, -236.7, -226.6, -216.5, -206.3, -196.2, -186.1, -175.9, -165.8, -155.7, -145.6, -135.4, -125.3, -115.2, -105.1, -94.9, -84.8, -74.7, -64.6, -54.4, -44.3, -34.2, -24.1, -13.9, -3.8, 6.3, 16.5, 26.6, 36.7, 46.8, 57.0, 67.1, 77.2, 87.3, 97.5, 107.6, 117.7, 127.8, 138.0, 148.1, 158.2, 168.4, 178.5, 188.6, 198.7, 208.9, 219.0, 229.1, 239.2, 249.4, 259.5, 269.6, 279.7, 289.9, 300.0, 300.0, 333.3, 366.7, 400.0, 433.3, 466.7, 500.0, 533.3, 566.7, 600.0}</p> |
|                                             |               | <p>[50] {-800.0, -766.7, -733.3, -700.0, -666.7, -633.3, -600.0, -566.7, -533.3, -500.0, -500.0, -489.9, -479.7, -469.6, -459.5, -449.4, -439.2, -429.1, -419.0, -408.9, -398.7, -388.6, -378.5, -368.4, -358.2, -348.1, -338.0, -327.8, -317.7, -307.6, -297.5, -287.3, -277.2, -267.1, -257.0, -246.8, -236.7, -226.6, -216.5, -206.3, -196.2, -186.1, -175.9, -165.8, -155.7, -145.6, -135.4, -125.3, -115.2, -105.1, -94.9, -84.8, -74.7, -64.6, -54.4, -44.3, -34.2, -24.1, -13.9, -3.8, 6.3, 16.5, 26.6, 36.7, 46.8, 57.0, 67.1, 77.2, 87.3, 97.5, 107.6, 117.7, 127.8, 138.0, 148.1, 158.2, 168.4, 178.5, 188.6, 198.7, 208.9, 219.0, 229.1, 239.2, 249.4, 259.5, 269.6, 279.7, 289.9, 300.0, 300.0, 333.3, 366.7, 400.0, 433.3, 466.7, 500.0, 533.3, 566.7, 600.0}</p> |
| <p>TAR-C24U25A35<br/>(-Mg<sup>2+</sup>)</p> | <p>U23-C6</p> | <p>[5] {-1000.0, -922.2, -844.4, -766.7, -688.9, -611.1, -533.3, -455.6, -377.8, -300.0, -300.0, -289.9, -279.7, -269.6, -259.5, -249.4, -239.2, -229.1, -219.0, -208.9, -198.7, -188.6, -178.5, -168.4, -158.2, -148.1, -138.0, -127.8, -117.7, -107.6, -97.5, -87.3, -77.2, -67.1, -57.0, -46.8, -36.7, -26.6, -16.5, -6.3, 3.8, 13.9, 24.1, 34.2, 44.3, 54.4, 64.6, 74.7, 84.8, 94.9, 105.1, 115.2, 125.3, 135.4, 145.6, 155.7, 165.8, 175.9, 186.1, 196.2, 206.3, 216.5, 226.6, 236.7, 246.8, 257.0, 267.1, 277.2, 287.3, 297.5, 307.6, 317.7, 327.8, 338.0, 348.1, 358.2, 368.4, 378.5, 388.6, 398.7, 408.9, 419.0, 429.1, 439.2, 449.4, 459.5, 469.6, 479.7, 489.9, 500.0, 500.0, 555.6, 611.1, 666.7, 722.2, 777.8, 833.3, 888.9, 944.4, 1000.0}</p>                    |
|                                             |               | <p>[10] {-1000.0, -922.2, -844.4, -766.7, -688.9, -611.1, -533.3, -455.6, -377.8, -300.0, -300.0, -289.9, -279.7, -269.6, -259.5, -249.4, -239.2, -229.1, -219.0, -208.9, -198.7, -188.6, -178.5, -168.4, -158.2, -148.1, -138.0, -127.8, -117.7, -107.6, -97.5, -87.3, -77.2, -67.1, -57.0, -46.8, -36.7, -26.6, -16.5, -6.3, 3.8, 13.9, 24.1, 34.2, 44.3, 54.4, 64.6, 74.7, 84.8, 94.9, 105.1, 115.2, 125.3, 135.4, 145.6, 155.7, 165.8, 175.9, 186.1, 196.2, 206.3, 216.5, 226.6, 236.7, 246.8, 257.0, 267.1, 277.2, 287.3, 297.5, 307.6, 317.7, 327.8, 338.0, 348.1, 358.2, 368.4, 378.5, 388.6, 398.7, 408.9, 419.0, 429.1, 439.2, 449.4, 459.5, 469.6, 479.7, 489.9, 500.0, 500.0, 555.6, 611.1, 666.7, 722.2, 777.8, 833.3, 888.9, 944.4, 1000.0}</p>                   |



|                                             |               |                                                                                                                                                                                                                                                                                                                                                                                                                                                                                                                                                                                                                                                                                                                                                                                  |
|---------------------------------------------|---------------|----------------------------------------------------------------------------------------------------------------------------------------------------------------------------------------------------------------------------------------------------------------------------------------------------------------------------------------------------------------------------------------------------------------------------------------------------------------------------------------------------------------------------------------------------------------------------------------------------------------------------------------------------------------------------------------------------------------------------------------------------------------------------------|
|                                             |               | <p>[25] {-1000.0, -922.2, -844.4, -766.7, -688.9, -611.1, -533.3, -455.6, -377.8, -300.0, -300.0, -289.9, -279.7, -269.6, -259.5, -249.4, -239.2, -229.1, -219.0, -208.9, -198.7, -188.6, -178.5, -168.4, -158.2, -148.1, -138.0, -127.8, -117.7, -107.6, -97.5, -87.3, -77.2, -67.1, -57.0, -46.8, -36.7, -26.6, -16.5, -6.3, 3.8, 13.9, 24.1, 34.2, 44.3, 54.4, 64.6, 74.7, 84.8, 94.9, 105.1, 115.2, 125.3, 135.4, 145.6, 155.7, 165.8, 175.9, 186.1, 196.2, 206.3, 216.5, 226.6, 236.7, 246.8, 257.0, 267.1, 277.2, 287.3, 297.5, 307.6, 317.7, 327.8, 338.0, 348.1, 358.2, 368.4, 378.5, 388.6, 398.7, 408.9, 419.0, 429.1, 439.2, 449.4, 459.5, 469.6, 479.7, 489.9, 500.0, 500.0, 555.6, 611.1, 666.7, 722.2, 777.8, 833.3, 888.9, 944.4, 1000.0}</p>                     |
|                                             |               | <p>[50] {-1000.0, -922.2, -844.4, -766.7, -688.9, -611.1, -533.3, -455.6, -377.8, -300.0, -300.0, -289.9, -279.7, -269.6, -259.5, -249.4, -239.2, -229.1, -219.0, -208.9, -198.7, -188.6, -178.5, -168.4, -158.2, -148.1, -138.0, -127.8, -117.7, -107.6, -97.5, -87.3, -77.2, -67.1, -57.0, -46.8, -36.7, -26.6, -16.5, -6.3, 3.8, 13.9, 24.1, 34.2, 44.3, 54.4, 64.6, 74.7, 84.8, 94.9, 105.1, 115.2, 125.3, 135.4, 145.6, 155.7, 165.8, 175.9, 186.1, 196.2, 206.3, 216.5, 226.6, 236.7, 246.8, 257.0, 267.1, 277.2, 287.3, 297.5, 307.6, 317.7, 327.8, 338.0, 348.1, 358.2, 368.4, 378.5, 388.6, 398.7, 408.9, 419.0, 429.1, 439.2, 449.4, 459.5, 469.6, 479.7, 489.9, 500.0, 500.0, 555.6, 611.1, 666.7, 722.2, 777.8, 833.3, 888.9, 944.4, 1000.0}</p>                     |
| <p>TAR-C24U25A35<br/>(-Mg<sup>2+</sup>)</p> | <p>U38-N3</p> | <p>[10] {-1000.0, -944.4, -888.9, -833.3, -777.8, -722.2, -666.7, -611.1, -555.6, -500.0, -500.0, -489.9, -479.7, -469.6, -459.5, -449.4, -439.2, -429.1, -419.0, -408.9, -398.7, -388.6, -378.5, -368.4, -358.2, -348.1, -338.0, -327.8, -317.7, -307.6, -297.5, -287.3, -277.2, -267.1, -257.0, -246.8, -236.7, -226.6, -216.5, -206.3, -196.2, -186.1, -175.9, -165.8, -155.7, -145.6, -135.4, -125.3, -115.2, -105.1, -94.9, -84.8, -74.7, -64.6, -54.4, -44.3, -34.2, -24.1, -13.9, -3.8, 6.3, 16.5, 26.6, 36.7, 46.8, 57.0, 67.1, 77.2, 87.3, 97.5, 107.6, 117.7, 127.8, 138.0, 148.1, 158.2, 168.4, 178.5, 188.6, 198.7, 208.9, 219.0, 229.1, 239.2, 249.4, 259.5, 269.6, 279.7, 289.9, 300.0, 300.0, 377.8, 455.6, 533.3, 611.1, 688.9, 766.7, 844.4, 922.2, 1000.0}</p> |
|                                             |               | <p>[20] {-1000.0, -944.4, -888.9, -833.3, -777.8, -722.2, -666.7, -611.1, -555.6, -500.0, -500.0, -489.9, -479.7, -469.6, -459.5, -449.4, -439.2, -429.1, -419.0, -408.9, -398.7, -388.6, -378.5, -368.4, -358.2, -348.1, -338.0, -327.8, -317.7, -307.6, -297.5, -287.3, -277.2, -267.1, -257.0, -246.8, -236.7, -226.6, -216.5, -206.3, -196.2, -186.1, -175.9, -165.8, -155.7, -145.6, -135.4, -125.3, -115.2, -105.1, -94.9, -84.8, -74.7, -64.6, -54.4, -44.3, -34.2, -24.1, -13.9, -3.8, 6.3, 16.5, 26.6, 36.7, 46.8, 57.0, 67.1, 77.2, 87.3, 97.5, 107.6, 117.7, 127.8, 138.0, 148.1, 158.2, 168.4, 178.5, 188.6, 198.7, 208.9, 219.0, 229.1, 239.2, 249.4, 259.5, 269.6, 279.7, 289.9, 300.0, 300.0, 377.8, 455.6, 533.3, 611.1, 688.9, 766.7, 844.4, 922.2, 1000.0}</p> |
|                                             |               | <p>[25] {-1000.0, -944.4, -888.9, -833.3, -777.8, -722.2, -666.7, -611.1, -555.6, -500.0, -500.0, -489.9, -479.7, -469.6, -459.5, -449.4, -439.2, -429.1, -419.0, -408.9, -398.7, -388.6, -378.5, -368.4, -358.2, -348.1, -338.0, -327.8, -317.7, -307.6, -297.5, -287.3, -277.2, -267.1, -257.0, -246.8, -236.7, -226.6, -216.5, -206.3, -196.2, -186.1, -175.9, -165.8, -155.7, -145.6, -135.4, -125.3, -115.2, -105.1, -94.9, -84.8, -74.7, -64.6, -54.4, -44.3, -34.2, -24.1, -13.9, -3.8, 6.3, 16.5, 26.6, 36.7, 46.8, 57.0, 67.1, 77.2, 87.3, 97.5, 107.6, 117.7, 127.8, 138.0, 148.1, 158.2, 168.4, 178.5, 188.6, 198.7, 208.9, 219.0, 229.1, 239.2, 249.4, 259.5, 269.6, 279.7, 289.9, 300.0, 300.0, 377.8, 455.6, 533.3, 611.1, 688.9, 766.7, 844.4, 922.2, 1000.0}</p> |
|                                             |               | <p>[30] {-1000.0, -944.4, -888.9, -833.3, -777.8, -722.2, -666.7, -611.1, -555.6, -500.0, -500.0, -489.9, -479.7, -469.6, -459.5, -449.4, -439.2, -429.1, -419.0, -408.9, -398.7, -388.6, -378.5, -368.4, -358.2, -348.1, -338.0, -327.8, -317.7, -307.6, -297.5, -287.3, -277.2, -267.1, -257.0, -246.8, -236.7, -226.6, -216.5, -206.3, -196.2, -186.1, -175.9, -165.8, -155.7, -145.6, -135.4, -125.3, -115.2, -105.1, -94.9, -84.8, -74.7, -64.6, -54.4, -44.3, -34.2, -24.1, -13.9, -3.8, 6.3, 16.5, 26.6, 36.7, 46.8, 57.0, 67.1, 77.2, 87.3, 97.5, 107.6, 117.7, 127.8, 138.0, 148.1,</p>                                                                                                                                                                                 |

|                                       |        |                                                                                                                                                                                                                                                                                                                                                                                                                                                                                                                                                                                                                                                                                                                                                                           |
|---------------------------------------|--------|---------------------------------------------------------------------------------------------------------------------------------------------------------------------------------------------------------------------------------------------------------------------------------------------------------------------------------------------------------------------------------------------------------------------------------------------------------------------------------------------------------------------------------------------------------------------------------------------------------------------------------------------------------------------------------------------------------------------------------------------------------------------------|
|                                       |        | 158.2, 168.4, 178.5, 188.6, 198.7, 208.9, 219.0, 229.1, 239.2, 249.4, 259.5, 269.6, 279.7, 289.9, 300.0, 300.0, 377.8, 455.6, 533.3, 611.1, 688.9, 766.7, 844.4, 922.2, 1000.0}                                                                                                                                                                                                                                                                                                                                                                                                                                                                                                                                                                                           |
| TAR-C24U25A35<br>(+Mg <sup>2+</sup> ) | U23-C6 | [10] {-1000.0, -922.2, -844.4, -766.7, -688.9, -611.1, -533.3, -455.6, -377.8, -300.0, -300.0, -289.9, -279.7, -269.6, -259.5, -249.4, -239.2, -229.1, -219.0, -208.9, -198.7, -188.6, -178.5, -168.4, -158.2, -148.1, -138.0, -127.8, -117.7, -107.6, -97.5, -87.3, -77.2, -67.1, -57.0, -46.8, -36.7, -26.6, -16.5, -6.3, 3.8, 13.9, 24.1, 34.2, 44.3, 54.4, 64.6, 74.7, 84.8, 94.9, 105.1, 115.2, 125.3, 135.4, 145.6, 155.7, 165.8, 175.9, 186.1, 196.2, 206.3, 216.5, 226.6, 236.7, 246.8, 257.0, 267.1, 277.2, 287.3, 297.5, 307.6, 317.7, 327.8, 338.0, 348.1, 358.2, 368.4, 378.5, 388.6, 398.7, 408.9, 419.0, 429.1, 439.2, 449.4, 459.5, 469.6, 479.7, 489.9, 500.0, 500.0, 555.6, 611.1, 666.7, 722.2, 777.8, 833.3, 888.9, 944.4, 1000.0}                     |
|                                       |        | [20] {-1000.0, -922.2, -844.4, -766.7, -688.9, -611.1, -533.3, -455.6, -377.8, -300.0, -300.0, -289.9, -279.7, -269.6, -259.5, -249.4, -239.2, -229.1, -219.0, -208.9, -198.7, -188.6, -178.5, -168.4, -158.2, -148.1, -138.0, -127.8, -117.7, -107.6, -97.5, -87.3, -77.2, -67.1, -57.0, -46.8, -36.7, -26.6, -16.5, -6.3, 3.8, 13.9, 24.1, 34.2, 44.3, 54.4, 64.6, 74.7, 84.8, 94.9, 105.1, 115.2, 125.3, 135.4, 145.6, 155.7, 165.8, 175.9, 186.1, 196.2, 206.3, 216.5, 226.6, 236.7, 246.8, 257.0, 267.1, 277.2, 287.3, 297.5, 307.6, 317.7, 327.8, 338.0, 348.1, 358.2, 368.4, 378.5, 388.6, 398.7, 408.9, 419.0, 429.1, 439.2, 449.4, 459.5, 469.6, 479.7, 489.9, 500.0, 500.0, 555.6, 611.1, 666.7, 722.2, 777.8, 833.3, 888.9, 944.4, 1000.0}                     |
|                                       |        | [30] {-1000.0, -922.2, -844.4, -766.7, -688.9, -611.1, -533.3, -455.6, -377.8, -300.0, -300.0, -289.9, -279.7, -269.6, -259.5, -249.4, -239.2, -229.1, -219.0, -208.9, -198.7, -188.6, -178.5, -168.4, -158.2, -148.1, -138.0, -127.8, -117.7, -107.6, -97.5, -87.3, -77.2, -67.1, -57.0, -46.8, -36.7, -26.6, -16.5, -6.3, 3.8, 13.9, 24.1, 34.2, 44.3, 54.4, 64.6, 74.7, 84.8, 94.9, 105.1, 115.2, 125.3, 135.4, 145.6, 155.7, 165.8, 175.9, 186.1, 196.2, 206.3, 216.5, 226.6, 236.7, 246.8, 257.0, 267.1, 277.2, 287.3, 297.5, 307.6, 317.7, 327.8, 338.0, 348.1, 358.2, 368.4, 378.5, 388.6, 398.7, 408.9, 419.0, 429.1, 439.2, 449.4, 459.5, 469.6, 479.7, 489.9, 500.0, 500.0, 555.6, 611.1, 666.7, 722.2, 777.8, 833.3, 888.9, 944.4, 1000.0}                     |
|                                       |        | [40] {-1000.0, -922.2, -844.4, -766.7, -688.9, -611.1, -533.3, -455.6, -377.8, -300.0, -300.0, -289.9, -279.7, -269.6, -259.5, -249.4, -239.2, -229.1, -219.0, -208.9, -198.7, -188.6, -178.5, -168.4, -158.2, -148.1, -138.0, -127.8, -117.7, -107.6, -97.5, -87.3, -77.2, -67.1, -57.0, -46.8, -36.7, -26.6, -16.5, -6.3, 3.8, 13.9, 24.1, 34.2, 44.3, 54.4, 64.6, 74.7, 84.8, 94.9, 105.1, 115.2, 125.3, 135.4, 145.6, 155.7, 165.8, 175.9, 186.1, 196.2, 206.3, 216.5, 226.6, 236.7, 246.8, 257.0, 267.1, 277.2, 287.3, 297.5, 307.6, 317.7, 327.8, 338.0, 348.1, 358.2, 368.4, 378.5, 388.6, 398.7, 408.9, 419.0, 429.1, 439.2, 449.4, 459.5, 469.6, 479.7, 489.9, 500.0, 500.0, 555.6, 611.1, 666.7, 722.2, 777.8, 833.3, 888.9, 944.4, 1000.0}                     |
| TAR-C24U25A35<br>(+Mg <sup>2+</sup> ) | U38-N3 | [10] {-1000.0, -944.4, -888.9, -833.3, -777.8, -722.2, -666.7, -611.1, -555.6, -500.0, -500.0, -489.9, -479.7, -469.6, -459.5, -449.4, -439.2, -429.1, -419.0, -408.9, -398.7, -388.6, -378.5, -368.4, -358.2, -348.1, -338.0, -327.8, -317.7, -307.6, -297.5, -287.3, -277.2, -267.1, -257.0, -246.8, -236.7, -226.6, -216.5, -206.3, -196.2, -186.1, -175.9, -165.8, -155.7, -145.6, -135.4, -125.3, -115.2, -105.1, -94.9, -84.8, -74.7, -64.6, -54.4, -44.3, -34.2, -24.1, -13.9, -3.8, 6.3, 16.5, 26.6, 36.7, 46.8, 57.0, 67.1, 77.2, 87.3, 97.5, 107.6, 117.7, 127.8, 138.0, 148.1, 158.2, 168.4, 178.5, 188.6, 198.7, 208.9, 219.0, 229.1, 239.2, 249.4, 259.5, 269.6, 279.7, 289.9, 300.0, 300.0, 377.8, 455.6, 533.3, 611.1, 688.9, 766.7, 844.4, 922.2, 1000.0} |
|                                       |        | [20] {-1000.0, -944.4, -888.9, -833.3, -777.8, -722.2, -666.7, -611.1, -555.6, -500.0, -500.0, -489.9, -479.7, -469.6, -459.5, -449.4, -439.2, -429.1, -419.0, -408.9, -398.7, -388.6, -378.5, -368.4, -358.2, -348.1, -338.0, -327.8, -317.7, -307.6, -297.5, -287.3, -277.2, -267.1, -257.0, -246.8, -236.7, -226.6, -216.5, -206.3, -196.2, -186.1, -175.9, -165.8, -155.7, -145.6, -135.4, -125.3, -115.2, -105.1, -94.9, -84.8, -74.7, -64.6, -54.4, -44.3, -34.2,                                                                                                                                                                                                                                                                                                   |

|  |  |                                                                                                                                                                                                                                                                                                                                                                                                                                                                                                                                                                                                                                                                                                                                                                           |
|--|--|---------------------------------------------------------------------------------------------------------------------------------------------------------------------------------------------------------------------------------------------------------------------------------------------------------------------------------------------------------------------------------------------------------------------------------------------------------------------------------------------------------------------------------------------------------------------------------------------------------------------------------------------------------------------------------------------------------------------------------------------------------------------------|
|  |  | -24.1, -13.9, -3.8, 6.3, 16.5, 26.6, 36.7, 46.8, 57.0, 67.1, 77.2, 87.3, 97.5, 107.6, 117.7, 127.8, 138.0, 148.1, 158.2, 168.4, 178.5, 188.6, 198.7, 208.9, 219.0, 229.1, 239.2, 249.4, 259.5, 269.6, 279.7, 289.9, 300.0, 300.0, 377.8, 455.6, 533.3, 611.1, 688.9, 766.7, 844.4, 922.2, 1000.0}                                                                                                                                                                                                                                                                                                                                                                                                                                                                         |
|  |  | [30] {-1000.0, -944.4, -888.9, -833.3, -777.8, -722.2, -666.7, -611.1, -555.6, -500.0, -500.0, -489.9, -479.7, -469.6, -459.5, -449.4, -439.2, -429.1, -419.0, -408.9, -398.7, -388.6, -378.5, -368.4, -358.2, -348.1, -338.0, -327.8, -317.7, -307.6, -297.5, -287.3, -277.2, -267.1, -257.0, -246.8, -236.7, -226.6, -216.5, -206.3, -196.2, -186.1, -175.9, -165.8, -155.7, -145.6, -135.4, -125.3, -115.2, -105.1, -94.9, -84.8, -74.7, -64.6, -54.4, -44.3, -34.2, -24.1, -13.9, -3.8, 6.3, 16.5, 26.6, 36.7, 46.8, 57.0, 67.1, 77.2, 87.3, 97.5, 107.6, 117.7, 127.8, 138.0, 148.1, 158.2, 168.4, 178.5, 188.6, 198.7, 208.9, 219.0, 229.1, 239.2, 249.4, 259.5, 269.6, 279.7, 289.9, 300.0, 300.0, 377.8, 455.6, 533.3, 611.1, 688.9, 766.7, 844.4, 922.2, 1000.0} |
|  |  | [40] {-1000.0, -944.4, -888.9, -833.3, -777.8, -722.2, -666.7, -611.1, -555.6, -500.0, -500.0, -489.9, -479.7, -469.6, -459.5, -449.4, -439.2, -429.1, -419.0, -408.9, -398.7, -388.6, -378.5, -368.4, -358.2, -348.1, -338.0, -327.8, -317.7, -307.6, -297.5, -287.3, -277.2, -267.1, -257.0, -246.8, -236.7, -226.6, -216.5, -206.3, -196.2, -186.1, -175.9, -165.8, -155.7, -145.6, -135.4, -125.3, -115.2, -105.1, -94.9, -84.8, -74.7, -64.6, -54.4, -44.3, -34.2, -24.1, -13.9, -3.8, 6.3, 16.5, 26.6, 36.7, 46.8, 57.0, 67.1, 77.2, 87.3, 97.5, 107.6, 117.7, 127.8, 138.0, 148.1, 158.2, 168.4, 178.5, 188.6, 198.7, 208.9, 219.0, 229.1, 239.2, 249.4, 259.5, 269.6, 279.7, 289.9, 300.0, 300.0, 377.8, 455.6, 533.3, 611.1, 688.9, 766.7, 844.4, 922.2, 1000.0} |

## Reference

1. Dethoff, E.A., Petzold, K., Chugh, J., Casiano-Negroni, A. and Al-Hashimi, H.M. (2012) Visualizing transient low-populated structures of RNA. *Nature*, **491**, 724-728.
2. Kimsey, I.J., Petzold, K., Sathyamoorthy, B., Stein, Z.W. and Al-Hashimi, H.M. (2015) Visualizing transient Watson-Crick-like mispairs in DNA and RNA duplexes. *Nature*, **519**, 315-320.
3. Lee, J., Dethoff, E.A. and Al-Hashimi, H.M. (2014) Invisible RNA state dynamically couples distant motifs. *Proc Natl Acad Sci*, **111**, 9485-9490.
